# Supplementary material for: Comparability of Point-of-Care versus Central Laboratory Hemoglobin Determination in Emergency Patients at a Supra-Maximal Care Hospital
Source: PubMed Central journal article supplement (PMC5120806; doi:10.1371/journal.pone.0166521), 2016-11-23
Supplement: pone.0166521.s002.pdf [file pone.0166521.s002.pdf]

| <b>AGE</b> | <b>SEX</b> | <b>HB-ZL</b> | <b>Result Hb-ZL</b> | <b>POCT-HB</b> | <b>Result POCT-HB</b> |
|------------|------------|--------------|---------------------|----------------|-----------------------|
| 82         | M          | HB           | 11.2                | P_THB          | 11.2                  |
| 34         | M          | HB           | 6.3                 | P_THB          | 6.3                   |
| 71         | W          | HB           | 10.8                | P_THB          | 10.8                  |
| 63         | W          | HB           | 12.6                | P_THB          | 12.6                  |
| 75         | M          | HB           | 13.2                | P_THB          | 13.2                  |
| 57         | M          | HB           | 14.2                | P_THB          | 14.2                  |
| 48         | M          | HB           | 14.5                | P_THB          | 14.5                  |
| 55         | M          | HB           | 14.9                | P_THB          | 14.9                  |
| 82         | M          | HB           | 14.0                | P_THB          | 14.0                  |
| 75         | M          | HB           | 14.1                | P_THB          | 14.1                  |
| 90         | M          | HB           | 5.7                 | P_THB          | 5.7                   |
| 60         | M          | HB           | 13.0                | P_THB          | 13.0                  |
| 49         | M          | HB           | 14.1                | P_THB          | 14.1                  |
| 90         | W          | HB           | 10.3                | P_THB          | 10.3                  |
| 84         | W          | HB           | 12.1                | P_THB          | 12.1                  |
| 66         | W          | HB           | 7.8                 | P_THB          | 7.8                   |
| 90         | W          | HB           | 12.2                | P_THB          | 12.2                  |
| 72         | M          | HB           | 12.0                | P_THB          | 12.0                  |
| 92         | W          | HB           | 12.7                | P_THB          | 12.7                  |
| 78         | W          | HB           | 12.4                | P_THB          | 12.4                  |
| 8          | M          | HB           | 13.5                | P_THB          | 13.5                  |
| 75         | M          | HB           | 15.4                | P_THB          | 15.4                  |
| 75         | W          | HB           | 16.9                | P_THB          | 16.9                  |
| 77         | M          | HB           | 14.2                | P_THB          | 14.2                  |
| 25         | M          | HB           | 15.1                | P_THB          | 15.1                  |
| 41         | M          | HB           | 16.0                | P_THB          | 16.0                  |
| 37         | W          | HB           | 15.2                | P_THB          | 15.2                  |
| 73         | M          | HB           | 14.2                | P_THB          | 14.2                  |
| 63         | M          | HB           | 8.7                 | P_THB          | 8.7                   |
| 71         | M          | HB           | 12.1                | P_THB          | 12.1                  |
| 17         | W          | HB           | 15.3                | P_THB          | 15.3                  |
| 85         | W          | HB           | 11.0                | P_THB          | 11.0                  |
| 89         | M          | HB           | 9.6                 | P_THB          | 9.6                   |
| 21         | M          | HB           | 14.6                | P_THB          | 14.6                  |
| 66         | M          | HB           | 14.9                | P_THB          | 14.9                  |
| 25         | W          | HB           | 14.2                | P_THB          | 14.2                  |
| 72         | M          | HB           | 12.8                | P_THB          | 12.8                  |
| 67         | M          | HB           | 12.8                | P_THB          | 12.8                  |
| 77         | W          | HB           | 14.3                | P_THB          | 14.3                  |
| 90         | W          | HB           | 15.6                | P_THB          | 15.6                  |
| 50         | M          | HB           | 14.9                | P_THB          | 14.9                  |
| 49         | M          | HB           | 13.3                | P_THB          | 13.3                  |
| 49         | M          | HB           | 14.0                | P_THB          | 14.0                  |
| 87         | W          | HB           | 10.1                | P_THB          | 10.1                  |
| 45         | M          | HB           | 15.7                | P_THB          | 15.7                  |
| 76         | W          | HB           | 12.5                | P_THB          | 12.5                  |
| 62         | M          | HB           | 13.7                | P_THB          | 13.7                  |
| 48         | M          | HB           | 15.4                | P_THB          | 15.4                  |
| 89         | W          | HB           | 7.1                 | P_THB          | 7.1                   |
| 39         | W          | HB           | 13.6                | P_THB          | 13.6                  |
| 88         | M          | HB           | 6.7                 | P_THB          | 6.7                   |
| 73         | M          | HB           | 15.4                | P_THB          | 15.4                  |
| 93         | W          | HB           | 17.5                | P_THB          | 17.5                  |
| 61         | M          | HB           | 16.5                | P_THB          | 16.5                  |
| 76         | M          | HB           | 13.4                | P_THB          | 13.4                  |

|    |   |    |      |       |      |
|----|---|----|------|-------|------|
| 17 | W | HB | 14.3 | P_THB | 14.3 |
| 73 | M | HB | 15.3 | P_THB | 15.3 |
| 76 | W | HB | 11.0 | P_THB | 11.0 |
| 54 | M | HB | 16.7 | P_THB | 16.7 |
| 19 | W | HB | 14.5 | P_THB | 14.5 |
| 74 | M | HB | 9.0  | P_THB | 9.0  |
| 67 | M | HB | 11.2 | P_THB | 11.2 |
| 54 | W | HB | 9.1  | P_THB | 9.1  |
| 71 | W | HB | 14.3 | P_THB | 14.3 |
| 28 | M | HB | 15.3 | P_THB | 15.3 |
| 72 | W | HB | 15.0 | P_THB | 15.0 |
| 79 | M | HB | 12.3 | P_THB | 12.3 |
| 81 | M | HB | 13.6 | P_THB | 13.6 |
| 77 | M | HB | 13.8 | P_THB | 13.8 |
| 76 | M | HB | 8.7  | P_THB | 8.7  |
| 66 | M | HB | 16.9 | P_THB | 16.9 |
| 86 | M | HB | 11.3 | P_THB | 11.3 |
| 57 | W | HB | 12.9 | P_THB | 12.9 |
| 64 | W | HB | 5.8  | P_THB | 5.8  |
| 57 | M | HB | 14.5 | P_THB | 14.5 |
| 41 | W | HB | 13.4 | P_THB | 13.4 |
| 79 | W | HB | 13.4 | P_THB | 13.4 |
| 45 | W | HB | 13.7 | P_THB | 13.7 |
| 62 | M | HB | 11.0 | P_THB | 11.0 |
| 93 | W | HB | 12.5 | P_THB | 12.5 |
| 66 | W | HB | 11.9 | P_THB | 11.9 |
| 39 | W | HB | 16.4 | P_THB | 16.4 |
| 76 | M | HB | 10.7 | P_THB | 10.7 |
| 71 | M | HB | 13.3 | P_THB | 13.3 |
| 56 | M | HB | 13.3 | P_THB | 13.3 |
| 79 | W | HB | 10.8 | P_THB | 10.8 |
| 59 | M | HB | 13.6 | P_THB | 13.6 |
| 73 | M | HB | 14.9 | P_THB | 14.9 |
| 69 | W | HB | 10.3 | P_THB | 10.3 |
| 63 | M | HB | 17.2 | P_THB | 17.3 |
| 70 | M | HB | 15.2 | P_THB | 15.1 |
| 75 | W | HB | 13.3 | P_THB | 13.4 |
| 71 | M | HB | 12.1 | P_THB | 12.2 |
| 68 | M | HB | 15.1 | P_THB | 15.2 |
| 83 | M | HB | 14.2 | P_THB | 14.1 |
| 30 | W | HB | 14.1 | P_THB | 14.2 |
| 86 | W | HB | 8.4  | P_THB | 8.3  |
| 64 | W | HB | 10.9 | P_THB | 10.8 |
| 69 | W | HB | 10.8 | P_THB | 10.9 |
| 52 | M | HB | 9.3  | P_THB | 9.4  |
| 86 | M | HB | 11.3 | P_THB | 11.4 |
| 87 | M | HB | 12.9 | P_THB | 12.8 |
| 52 | M | HB | 14.8 | P_THB | 14.9 |
| 50 | M | HB | 14.3 | P_THB | 14.4 |
| 63 | M | HB | 11.2 | P_THB | 11.1 |
| 85 | W | HB | 11.8 | P_THB | 11.9 |
| 83 | M | HB | 13.1 | P_THB | 13.2 |
| 81 | W | HB | 10.3 | P_THB | 10.4 |
| 64 | W | HB | 10.8 | P_THB | 10.9 |
| 19 | M | HB | 15.1 | P_THB | 15.2 |
| 77 | M | HB | 13.8 | P_THB | 13.9 |

|    |   |    |      |       |      |
|----|---|----|------|-------|------|
| 78 | W | HB | 15.3 | P_THB | 15.4 |
| 86 | W | HB | 15.1 | P_THB | 15.2 |
| 54 | M | HB | 12.1 | P_THB | 12.2 |
| 64 | M | HB | 14.1 | P_THB | 14.2 |
| 86 | W | HB | 10.8 | P_THB | 10.9 |
| 63 | M | HB | 9.1  | P_THB | 9.2  |
| 80 | M | HB | 11.2 | P_THB | 11.1 |
| 39 | M | HB | 11.2 | P_THB | 11.1 |
| 80 | W | HB | 12.3 | P_THB | 12.4 |
| 35 | M | HB | 15.1 | P_THB | 15.2 |
| 88 | W | HB | 12.4 | P_THB | 12.3 |
| 45 | M | HB | 14.8 | P_THB | 14.9 |
| 43 | M | HB | 13.9 | P_THB | 13.8 |
| 50 | M | HB | 15.8 | P_THB | 15.9 |
| 73 | M | HB | 11.8 | P_THB | 11.9 |
| 63 | M | HB | 14.1 | P_THB | 14.2 |
| 44 | W | HB | 9.6  | P_THB | 9.7  |
| 82 | M | HB | 12.7 | P_THB | 12.6 |
| 62 | M | HB | 12.3 | P_THB | 12.4 |
| 18 | W | HB | 14.1 | P_THB | 14.2 |
| 76 | M | HB | 9.7  | P_THB | 9.6  |
| 74 | W | HB | 14.8 | P_THB | 14.9 |
| 31 | W | HB | 11.1 | P_THB | 11.2 |
| 75 | M | HB | 13.1 | P_THB | 13.2 |
| 47 | M | HB | 15.9 | P_THB | 15.8 |
| 53 | M | HB | 15.6 | P_THB | 15.7 |
| 77 | W | HB | 12.2 | P_THB | 12.1 |
| 35 | M | HB | 15.7 | P_THB | 15.6 |
| 31 | M | HB | 14.7 | P_THB | 14.6 |
| 79 | M | HB | 11.7 | P_THB | 11.6 |
| 72 | M | HB | 15.2 | P_THB | 15.1 |
| 67 | W | HB | 12.4 | P_THB | 12.3 |
| 76 | M | HB | 12.1 | P_THB | 12.2 |
| 17 | W | HB | 14.1 | P_THB | 14.2 |
| 86 | M | HB | 5.9  | P_THB | 5.8  |
| 79 | W | HB | 7.2  | P_THB | 7.1  |
| 61 | M | HB | 5.5  | P_THB | 5.4  |
| 58 | M | HB | 4.8  | P_THB | 4.9  |
| 67 | M | HB | 15.2 | P_THB | 15.3 |
| 92 | W | HB | 12.4 | P_THB | 12.5 |
| 78 | M | HB | 11.9 | P_THB | 12.0 |
| 25 | W | HB | 13.9 | P_THB | 14.0 |
| 60 | M | HB | 11.4 | P_THB | 11.5 |
| 19 | W | HB | 12.5 | P_THB | 12.6 |
| 91 | M | HB | 8.5  | P_THB | 8.6  |
| 85 | W | HB | 13.5 | P_THB | 13.4 |
| 97 | W | HB | 14.3 | P_THB | 14.2 |
| 93 | M | HB | 13.5 | P_THB | 13.4 |
| 40 | M | HB | 17.1 | P_THB | 17.2 |
| 50 | W | HB | 14.0 | P_THB | 13.9 |
| 56 | W | HB | 14.9 | P_THB | 15.0 |
| 74 | M | HB | 9.4  | P_THB | 9.5  |
| 44 | M | HB | 13.1 | P_THB | 13.0 |
| 58 | M | HB | 10.1 | P_THB | 10.0 |
| 87 | W | HB | 13.4 | P_THB | 13.5 |
| 54 | W | HB | 14.1 | P_THB | 14.0 |

|    |   |    |      |       |      |
|----|---|----|------|-------|------|
| 77 | M | HB | 15.0 | P_THB | 15.1 |
| 53 | M | HB | 15.2 | P_THB | 15.3 |
| 66 | M | HB | 14.0 | P_THB | 13.9 |
| 27 | W | HB | 9.7  | P_THB | 9.8  |
| 71 | M | HB | 10.8 | P_THB | 10.7 |
| 81 | M | HB | 13.9 | P_THB | 14.0 |
| 77 | M | HB | 15.2 | P_THB | 15.3 |
| 77 | M | HB | 10.7 | P_THB | 10.8 |
| 90 | W | HB | 14.7 | P_THB | 14.8 |
| 80 | W | HB | 13.2 | P_THB | 13.3 |
| 33 | W | HB | 12.4 | P_THB | 12.5 |
| 58 | W | HB | 13.4 | P_THB | 13.5 |
| 27 | W | HB | 13.3 | P_THB | 13.2 |
| 52 | M | HB | 15.3 | P_THB | 15.2 |
| 59 | M | HB | 14.7 | P_THB | 14.8 |
| 75 | M | HB | 8.4  | P_THB | 8.5  |
| 68 | M | HB | 10.6 | P_THB | 10.5 |
| 67 | M | HB | 11.7 | P_THB | 11.8 |
| 72 | M | HB | 9.1  | P_THB | 9.0  |
| 24 | M | HB | 15.2 | P_THB | 15.3 |
| 30 | M | HB | 15.4 | P_THB | 15.5 |
| 46 | M | HB | 15.7 | P_THB | 15.8 |
| 77 | M | HB | 12.9 | P_THB | 13.0 |
| 78 | M | HB | 8.4  | P_THB | 8.5  |
| 68 | M | HB | 10.0 | P_THB | 9.9  |
| 64 | W | HB | 13.9 | P_THB | 14.0 |
| 41 | W | HB | 14.7 | P_THB | 14.8 |
| 53 | M | HB | 11.6 | P_THB | 11.5 |
| 25 | W | HB | 15.1 | P_THB | 15.0 |
| 73 | W | HB | 13.6 | P_THB | 13.5 |
| 59 | M | HB | 14.7 | P_THB | 14.8 |
| 46 | M | HB | 17.6 | P_THB | 17.7 |
| 28 | W | HB | 13.5 | P_THB | 13.6 |
| 88 | W | HB | 9.8  | P_THB | 9.7  |
| 80 | W | HB | 13.0 | P_THB | 13.1 |
| 76 | M | HB | 9.5  | P_THB | 9.6  |
| 26 | W | HB | 12.5 | P_THB | 12.6 |
| 58 | M | HB | 11.6 | P_THB | 11.5 |
| 89 | M | HB | 12.7 | P_THB | 12.8 |
| 18 | W | HB | 13.7 | P_THB | 13.8 |
| 58 | M | HB | 13.5 | P_THB | 13.6 |
| 70 | M | HB | 10.0 | P_THB | 9.9  |
| 39 | W | HB | 12.7 | P_THB | 12.8 |
| 25 | M | HB | 14.5 | P_THB | 14.4 |
| 61 | M | HB | 12.9 | P_THB | 13.0 |
| 79 | W | HB | 13.5 | P_THB | 13.6 |
| 78 | M | HB | 11.9 | P_THB | 12.0 |
| 48 | M | HB | 15.5 | P_THB | 15.6 |
| 16 | M | HB | 15.4 | P_THB | 15.5 |
| 81 | W | HB | 12.3 | P_THB | 12.2 |
| 60 | M | HB | 12.2 | P_THB | 12.3 |
| 39 | M | HB | 16.0 | P_THB | 16.1 |
| 89 | M | HB | 12.2 | P_THB | 12.3 |
| 26 | W | HB | 8.5  | P_THB | 8.6  |
| 46 | M | HB | 13.2 | P_THB | 13.3 |
| 77 | W | HB | 8.3  | P_THB | 8.2  |

|    |   |    |      |       |      |
|----|---|----|------|-------|------|
| 56 | M | HB | 16.2 | P_THB | 16.1 |
| 55 | M | HB | 13.9 | P_THB | 14.0 |
| 64 | M | HB | 14.9 | P_THB | 15.0 |
| 23 | M | HB | 16.1 | P_THB | 16.2 |
| 19 | W | HB | 13.5 | P_THB | 13.6 |
| 61 | M | HB | 14.2 | P_THB | 14.3 |
| 28 | W | HB | 14.1 | P_THB | 14.0 |
| 44 | M | HB | 16.0 | P_THB | 15.9 |
| 69 | M | HB | 8.5  | P_THB | 8.6  |
| 80 | M | HB | 14.0 | P_THB | 13.9 |
| 30 | M | HB | 14.4 | P_THB | 14.5 |
| 41 | W | HB | 11.5 | P_THB | 11.6 |
| 59 | M | HB | 13.2 | P_THB | 13.3 |
| 55 | W | HB | 14.2 | P_THB | 14.3 |
| 83 | W | HB | 8.4  | P_THB | 8.5  |
| 73 | M | HB | 14.3 | P_THB | 14.2 |
| 63 | M | HB | 12.8 | P_THB | 12.7 |
| 63 | M | HB | 6.8  | P_THB | 6.7  |
| 72 | M | HB | 10.0 | P_THB | 10.1 |
| 84 | W | HB | 17.7 | P_THB | 17.9 |
| 50 | M | HB | 16.6 | P_THB | 16.8 |
| 26 | M | HB | 13.1 | P_THB | 13.3 |
| 40 | M | HB | 14.6 | P_THB | 14.8 |
| 20 | M | HB | 15.6 | P_THB | 15.8 |
| 53 | M | HB | 15.1 | P_THB | 15.3 |
| 50 | M | HB | 12.3 | P_THB | 12.5 |
| 22 | M | HB | 15.5 | P_THB | 15.3 |
| 81 | M | HB | 10.0 | P_THB | 9.8  |
| 52 | W | HB | 13.8 | P_THB | 14.0 |
| 92 | W | HB | 12.8 | P_THB | 12.6 |
| 78 | M | HB | 9.4  | P_THB | 9.2  |
| 60 | M | HB | 12.0 | P_THB | 12.2 |
| 71 | W | HB | 14.1 | P_THB | 14.3 |
| 21 | W | HB | 11.3 | P_THB | 11.5 |
| 75 | M | HB | 15.3 | P_THB | 15.5 |
| 80 | W | HB | 11.5 | P_THB | 11.7 |
| 74 | W | HB | 13.8 | P_THB | 14.0 |
| 77 | W | HB | 4.9  | P_THB | 5.1  |
| 47 | W | HB | 11.8 | P_THB | 12.0 |
| 74 | M | HB | 12.7 | P_THB | 12.9 |
| 54 | M | HB | 12.9 | P_THB | 12.7 |
| 16 | M | HB | 14.8 | P_THB | 15.0 |
| 91 | W | HB | 14.6 | P_THB | 14.8 |
| 84 | M | HB | 10.8 | P_THB | 11.0 |
| 73 | M | HB | 10.7 | P_THB | 10.5 |
| 78 | M | HB | 11.6 | P_THB | 11.8 |
| 81 | M | HB | 8.2  | P_THB | 8.4  |
| 63 | M | HB | 14.2 | P_THB | 14.4 |
| 52 | M | HB | 14.5 | P_THB | 14.7 |
| 75 | M | HB | 10.3 | P_THB | 10.5 |
| 34 | W | HB | 13.6 | P_THB | 13.8 |
| 52 | W | HB | 12.7 | P_THB | 12.9 |
| 34 | W | HB | 13.8 | P_THB | 14.0 |
| 64 | M | HB | 14.7 | P_THB | 14.5 |
| 67 | M | HB | 12.5 | P_THB | 12.3 |
| 27 | W | HB | 14.2 | P_THB | 14.0 |

|    |   |    |      |       |      |
|----|---|----|------|-------|------|
| 59 | M | HB | 12.7 | P_THB | 12.5 |
| 64 | W | HB | 9.8  | P_THB | 10.0 |
| 75 | W | HB | 9.8  | P_THB | 10.0 |
| 79 | M | HB | 13.7 | P_THB | 13.9 |
| 81 | W | HB | 14.2 | P_THB | 14.4 |
| 27 | W | HB | 13.3 | P_THB | 13.5 |
| 59 | M | HB | 12.7 | P_THB | 12.9 |
| 45 | M | HB | 14.0 | P_THB | 14.2 |
| 38 | W | HB | 10.0 | P_THB | 10.2 |
| 72 | M | HB | 8.0  | P_THB | 7.8  |
| 89 | M | HB | 12.8 | P_THB | 12.6 |
| 94 | W | HB | 14.3 | P_THB | 14.5 |
| 77 | M | HB | 12.2 | P_THB | 12.0 |
| 45 | M | HB | 15.5 | P_THB | 15.7 |
| 50 | W | HB | 15.5 | P_THB | 15.3 |
| 27 | M | HB | 14.2 | P_THB | 14.4 |
| 80 | M | HB | 9.2  | P_THB | 9.0  |
| 63 | M | HB | 12.7 | P_THB | 12.9 |
| 76 | W | HB | 12.8 | P_THB | 13.0 |
| 82 | W | HB | 11.7 | P_THB | 11.9 |
| 54 | W | HB | 12.8 | P_THB | 12.6 |
| 95 | W | HB | 12.8 | P_THB | 12.6 |
| 57 | W | HB | 14.5 | P_THB | 14.7 |
| 24 | M | HB | 15.7 | P_THB | 15.9 |
| 46 | W | HB | 11.0 | P_THB | 11.2 |
| 66 | M | HB | 10.8 | P_THB | 11.0 |
| 26 | M | HB | 14.8 | P_THB | 15.0 |
| 22 | W | HB | 11.0 | P_THB | 10.8 |
| 81 | M | HB | 12.7 | P_THB | 12.9 |
| 35 | M | HB | 14.4 | P_THB | 14.2 |
| 60 | M | HB | 13.8 | P_THB | 14.0 |
| 39 | W | HB | 13.4 | P_THB | 13.2 |
| 79 | M | HB | 14.2 | P_THB | 14.4 |
| 58 | W | HB | 10.5 | P_THB | 10.7 |
| 89 | M | HB | 14.8 | P_THB | 15.0 |
| 48 | M | HB | 12.2 | P_THB | 12.0 |
| 54 | M | HB | 15.1 | P_THB | 15.3 |
| 88 | M | HB | 7.8  | P_THB | 8.0  |
| 78 | M | HB | 11.8 | P_THB | 12.0 |
| 89 | M | HB | 14.4 | P_THB | 14.2 |
| 58 | M | HB | 14.5 | P_THB | 14.7 |
| 61 | W | HB | 10.2 | P_THB | 10.4 |
| 74 | M | HB | 12.4 | P_THB | 12.2 |
| 58 | M | HB | 7.8  | P_THB | 8.0  |
| 27 | W | HB | 13.7 | P_THB | 13.9 |
| 41 | W | HB | 12.1 | P_THB | 12.3 |
| 36 | W | HB | 11.6 | P_THB | 11.8 |
| 77 | M | HB | 8.7  | P_THB | 8.9  |
| 26 | W | HB | 14.7 | P_THB | 14.9 |
| 77 | M | HB | 10.7 | P_THB | 10.9 |
| 60 | W | HB | 12.6 | P_THB | 12.8 |
| 55 | M | HB | 14.1 | P_THB | 14.3 |
| 26 | W | HB | 12.6 | P_THB | 12.8 |
| 79 | W | HB | 11.3 | P_THB | 11.1 |
| 37 | W | HB | 11.0 | P_THB | 11.2 |
| 78 | W | HB | 11.1 | P_THB | 11.3 |

|    |   |    |      |       |      |
|----|---|----|------|-------|------|
| 21 | W | HB | 13.5 | P_THB | 13.7 |
| 47 | M | HB | 15.7 | P_THB | 15.5 |
| 46 | W | HB | 12.7 | P_THB | 12.5 |
| 73 | W | HB | 9.7  | P_THB | 9.9  |
| 34 | M | HB | 14.8 | P_THB | 15.0 |
| 45 | M | HB | 14.5 | P_THB | 14.3 |
| 78 | M | HB | 12.6 | P_THB | 12.8 |
| 19 | W | HB | 12.6 | P_THB | 12.8 |
| 82 | W | HB | 11.8 | P_THB | 12.0 |
| 50 | W | HB | 12.3 | P_THB | 12.1 |
| 59 | M | HB | 15.8 | P_THB | 16.0 |
| 85 | W | HB | 13.8 | P_THB | 13.6 |
| 61 | W | HB | 12.2 | P_THB | 12.0 |
| 39 | W | HB | 12.5 | P_THB | 12.7 |
| 72 | W | HB | 14.0 | P_THB | 14.2 |
| 50 | W | HB | 12.2 | P_THB | 12.4 |
| 74 | M | HB | 12.7 | P_THB | 12.5 |
| 65 | M | HB | 12.0 | P_THB | 12.2 |
| 88 | W | HB | 13.1 | P_THB | 13.3 |
| 82 | M | HB | 7.4  | P_THB | 7.6  |
| 34 | W | HB | 11.1 | P_THB | 11.3 |
| 73 | W | HB | 12.7 | P_THB | 12.5 |
| 28 | W | HB | 13.2 | P_THB | 13.4 |
| 72 | M | HB | 8.4  | P_THB | 8.2  |
| 79 | M | HB | 15.8 | P_THB | 16.0 |
| 22 | W | HB | 14.2 | P_THB | 14.4 |
| 33 | M | HB | 13.9 | P_THB | 13.7 |
| 71 | W | HB | 13.2 | P_THB | 13.4 |
| 67 | M | HB | 15.5 | P_THB | 15.7 |
| 39 | M | HB | 13.2 | P_THB | 13.4 |
| 28 | M | HB | 14.5 | P_THB | 14.7 |
| 57 | W | HB | 10.7 | P_THB | 10.9 |
| 93 | W | HB | 10.3 | P_THB | 10.5 |
| 43 | W | HB | 13.4 | P_THB | 13.2 |
| 38 | M | HB | 13.2 | P_THB | 13.4 |
| 42 | M | HB | 14.0 | P_THB | 14.2 |
| 46 | M | HB | 15.3 | P_THB | 15.1 |
| 72 | M | HB | 11.7 | P_THB | 11.9 |
| 73 | W | HB | 10.8 | P_THB | 10.6 |
| 49 | M | HB | 13.1 | P_THB | 13.3 |
| 28 | M | HB | 13.8 | P_THB | 14.0 |
| 28 | M | HB | 11.1 | P_THB | 11.3 |
| 86 | W | HB | 10.3 | P_THB | 10.5 |
| 76 | M | HB | 12.3 | P_THB | 12.1 |
| 58 | M | HB | 15.6 | P_THB | 15.8 |
| 59 | W | HB | 13.3 | P_THB | 13.5 |
| 52 | W | HB | 9.3  | P_THB | 9.5  |
| 31 | W | HB | 14.2 | P_THB | 14.4 |
| 39 | W | HB | 12.1 | P_THB | 12.3 |
| 75 | W | HB | 15.5 | P_THB | 15.7 |
| 46 | M | HB | 9.6  | P_THB | 9.8  |
| 71 | M | HB | 7.7  | P_THB | 7.9  |
| 52 | W | HB | 7.9  | P_THB | 8.1  |
| 52 | W | HB | 11.9 | P_THB | 12.1 |
| 67 | W | HB | 12.4 | P_THB | 12.6 |
| 34 | W | HB | 13.9 | P_THB | 14.1 |

|    |   |    |      |       |      |
|----|---|----|------|-------|------|
| 53 | M | HB | 12.4 | P_THB | 12.6 |
| 83 | W | HB | 12.9 | P_THB | 13.1 |
| 58 | M | HB | 16.0 | P_THB | 16.2 |
| 46 | M | HB | 14.9 | P_THB | 15.1 |
| 14 | W | HB | 12.1 | P_THB | 11.9 |
| 28 | M | HB | 14.9 | P_THB | 15.1 |
| 77 | M | HB | 13.1 | P_THB | 12.9 |
| 30 | M | HB | 16.9 | P_THB | 17.1 |
| 70 | M | HB | 16.0 | P_THB | 16.2 |
| 70 | W | HB | 11.9 | P_THB | 12.1 |
| 79 | M | HB | 13.1 | P_THB | 12.9 |
| 47 | M | HB | 16.2 | P_THB | 16.0 |
| 23 | M | HB | 17.5 | P_THB | 17.7 |
| 61 | M | HB | 13.9 | P_THB | 14.1 |
| 44 | M | HB | 16.0 | P_THB | 16.2 |
| 57 | W | HB | 16.1 | P_THB | 15.9 |
| 20 | W | HB | 11.4 | P_THB | 11.6 |
| 65 | M | HB | 9.6  | P_THB | 9.4  |
| 24 | W | HB | 10.4 | P_THB | 10.6 |
| 76 | M | HB | 13.4 | P_THB | 13.6 |
| 72 | M | HB | 16.5 | P_THB | 16.7 |
| 26 | M | HB | 14.9 | P_THB | 15.1 |
| 65 | M | HB | 13.6 | P_THB | 13.4 |
| 37 | W | HB | 12.9 | P_THB | 13.1 |
| 34 | M | HB | 13.9 | P_THB | 14.1 |
| 84 | W | HB | 10.4 | P_THB | 10.6 |
| 47 | W | HB | 13.9 | P_THB | 14.1 |
| 46 | M | HB | 16.3 | P_THB | 16.5 |
| 75 | M | HB | 11.9 | P_THB | 12.1 |
| 72 | M | HB | 12.9 | P_THB | 13.1 |
| 29 | M | HB | 15.4 | P_THB | 15.6 |
| 29 | W | HB | 12.6 | P_THB | 12.4 |
| 49 | M | HB | 16.0 | P_THB | 16.2 |
| 50 | M | HB | 15.4 | P_THB | 15.6 |
| 22 | W | HB | 12.6 | P_THB | 12.4 |
| 81 | W | HB | 12.4 | P_THB | 12.6 |
| 26 | W | HB | 11.6 | P_THB | 11.4 |
| 71 | W | HB | 9.4  | P_THB | 9.6  |
| 77 | M | HB | 16.1 | P_THB | 15.9 |
| 54 | W | HB | 15.6 | P_THB | 15.4 |
| 93 | W | HB | 12.9 | P_THB | 12.6 |
| 78 | M | HB | 14.1 | P_THB | 14.4 |
| 45 | M | HB | 14.1 | P_THB | 14.4 |
| 85 | W | HB | 12.1 | P_THB | 12.4 |
| 70 | M | HB | 11.1 | P_THB | 11.4 |
| 89 | W | HB | 11.6 | P_THB | 11.9 |
| 60 | M | HB | 15.1 | P_THB | 15.4 |
| 73 | M | HB | 12.6 | P_THB | 12.9 |
| 26 | W | HB | 13.6 | P_THB | 13.9 |
| 71 | W | HB | 15.9 | P_THB | 15.6 |
| 75 | W | HB | 11.1 | P_THB | 11.4 |
| 77 | M | HB | 14.1 | P_THB | 14.4 |
| 48 | W | HB | 11.6 | P_THB | 11.9 |
| 59 | W | HB | 15.1 | P_THB | 15.4 |
| 50 | W | HB | 13.4 | P_THB | 13.1 |
| 74 | M | HB | 14.4 | P_THB | 14.1 |



|    |   |    |      |       |      |
|----|---|----|------|-------|------|
| 39 | M | HB | 14.1 | P_THB | 14.4 |
| 68 | W | HB | 14.6 | P_THB | 14.9 |
| 83 | M | HB | 8.1  | P_THB | 8.4  |
| 82 | M | HB | 12.6 | P_THB | 12.9 |
| 84 | M | HB | 9.9  | P_THB | 9.6  |
| 38 | W | HB | 14.6 | P_THB | 14.9 |
| 48 | W | HB | 11.1 | P_THB | 11.4 |
| 46 | M | HB | 9.1  | P_THB | 9.4  |
| 83 | M | HB | 13.1 | P_THB | 13.4 |
| 64 | W | HB | 10.6 | P_THB | 10.9 |
| 62 | M | HB | 16.2 | P_THB | 16.5 |
| 16 | M | HB | 16.7 | P_THB | 17.0 |
| 55 | M | HB | 17.0 | P_THB | 17.3 |
| 81 | M | HB | 15.6 | P_THB | 15.9 |
| 26 | W | HB | 11.6 | P_THB | 11.9 |
| 79 | W | HB | 11.9 | P_THB | 11.6 |
| 77 | W | HB | 12.1 | P_THB | 12.4 |
| 53 | M | HB | 10.1 | P_THB | 10.4 |
| 83 | M | HB | 10.1 | P_THB | 10.4 |
| 29 | M | HB | 15.1 | P_THB | 15.4 |
| 65 | M | HB | 11.6 | P_THB | 11.9 |
| 36 | W | HB | 13.6 | P_THB | 13.9 |
| 53 | M | HB | 14.1 | P_THB | 14.4 |
| 94 | W | HB | 12.1 | P_THB | 12.4 |
| 69 | M | HB | 13.4 | P_THB | 13.1 |
| 63 | M | HB | 8.6  | P_THB | 8.9  |
| 28 | M | HB | 15.9 | P_THB | 15.6 |
| 49 | M | HB | 14.6 | P_THB | 14.9 |
| 36 | M | HB | 14.1 | P_THB | 14.4 |
| 50 | M | HB | 12.1 | P_THB | 12.4 |
| 57 | W | HB | 13.1 | P_THB | 13.4 |
| 80 | W | HB | 10.6 | P_THB | 10.9 |
| 42 | M | HB | 14.6 | P_THB | 14.9 |
| 79 | M | HB | 18.8 | P_THB | 18.5 |
| 34 | W | HB | 13.9 | P_THB | 13.6 |
| 90 | M | HB | 8.2  | P_THB | 7.9  |
| 44 | W | HB | 11.7 | P_THB | 12.0 |
| 56 | M | HB | 15.1 | P_THB | 14.8 |
| 66 | W | HB | 15.7 | P_THB | 15.4 |
| 63 | M | HB | 13.1 | P_THB | 12.8 |
| 55 | M | HB | 14.3 | P_THB | 14.6 |
| 62 | W | HB | 9.9  | P_THB | 10.2 |
| 63 | M | HB | 14.9 | P_THB | 15.2 |
| 59 | W | HB | 12.3 | P_THB | 12.6 |
| 42 | W | HB | 13.5 | P_THB | 13.8 |
| 87 | M | HB | 11.7 | P_THB | 12.0 |
| 27 | M | HB | 15.6 | P_THB | 15.3 |
| 66 | W | HB | 14.5 | P_THB | 14.8 |
| 83 | W | HB | 10.5 | P_THB | 10.8 |
| 89 | W | HB | 11.7 | P_THB | 12.0 |
| 54 | W | HB | 11.5 | P_THB | 11.2 |
| 75 | M | HB | 15.2 | P_THB | 15.5 |
| 71 | M | HB | 14.3 | P_THB | 14.6 |
| 51 | M | HB | 12.8 | P_THB | 13.1 |
| 26 | M | HB | 14.9 | P_THB | 15.2 |
| 71 | M | HB | 15.4 | P_THB | 15.7 |

|    |   |    |      |       |      |
|----|---|----|------|-------|------|
| 26 | W | HB | 15.0 | P_THB | 15.3 |
| 67 | W | HB | 11.0 | P_THB | 11.3 |
| 50 | W | HB | 11.3 | P_THB | 11.6 |
| 78 | W | HB | 12.0 | P_THB | 12.3 |
| 20 | W | HB | 13.1 | P_THB | 12.8 |
| 59 | W | HB | 13.9 | P_THB | 14.2 |
| 38 | W | HB | 12.0 | P_THB | 12.3 |
| 54 | W | HB | 14.8 | P_THB | 15.1 |
| 79 | M | HB | 13.4 | P_THB | 13.7 |
| 47 | M | HB | 12.8 | P_THB | 13.1 |
| 79 | W | HB | 12.5 | P_THB | 12.2 |
| 40 | M | HB | 14.8 | P_THB | 15.1 |
| 75 | M | HB | 12.8 | P_THB | 13.1 |
| 47 | M | HB | 9.2  | P_THB | 9.5  |
| 70 | W | HB | 10.4 | P_THB | 10.7 |
| 38 | M | HB | 15.6 | P_THB | 15.3 |
| 74 | M | HB | 13.2 | P_THB | 13.5 |
| 49 | W | HB | 13.5 | P_THB | 13.2 |
| 71 | M | HB | 12.0 | P_THB | 12.3 |
| 34 | W | HB | 13.7 | P_THB | 14.0 |
| 78 | M | HB | 9.0  | P_THB | 8.7  |
| 89 | M | HB | 12.3 | P_THB | 12.6 |
| 48 | M | HB | 10.0 | P_THB | 10.3 |
| 72 | M | HB | 8.4  | P_THB | 8.7  |
| 69 | W | HB | 13.7 | P_THB | 14.0 |
| 21 | M | HB | 12.2 | P_THB | 12.5 |
| 62 | W | HB | 14.2 | P_THB | 14.5 |
| 63 | M | HB | 13.9 | P_THB | 14.2 |
| 88 | W | HB | 14.7 | P_THB | 15.0 |
| 54 | M | HB | 14.9 | P_THB | 15.2 |
| 62 | M | HB | 8.8  | P_THB | 9.1  |
| 72 | W | HB | 12.7 | P_THB | 13.0 |
| 84 | W | HB | 12.5 | P_THB | 12.8 |
| 42 | M | HB | 13.2 | P_THB | 12.9 |
| 91 | M | HB | 11.4 | P_THB | 11.7 |
| 77 | M | HB | 8.8  | P_THB | 9.1  |
| 49 | M | HB | 13.8 | P_THB | 14.1 |
| 86 | W | HB | 12.7 | P_THB | 13.0 |
| 94 | W | HB | 9.3  | P_THB | 9.6  |
| 59 | W | HB | 13.7 | P_THB | 14.0 |
| 24 | M | HB | 14.7 | P_THB | 15.0 |
| 76 | M | HB | 13.8 | P_THB | 13.5 |
| 96 | W | HB | 15.1 | P_THB | 14.8 |
| 68 | M | HB | 13.9 | P_THB | 14.2 |
| 59 | W | HB | 10.8 | P_THB | 11.1 |
| 78 | M | HB | 9.4  | P_THB | 9.7  |
| 62 | M | HB | 15.7 | P_THB | 16.0 |
| 21 | M | HB | 15.7 | P_THB | 15.4 |
| 63 | W | HB | 11.2 | P_THB | 11.5 |
| 44 | M | HB | 15.5 | P_THB | 15.8 |
| 58 | M | HB | 14.4 | P_THB | 14.7 |
| 79 | W | HB | 13.0 | P_THB | 12.7 |
| 41 | W | HB | 13.9 | P_THB | 14.2 |
| 81 | W | HB | 11.7 | P_THB | 12.0 |
| 36 | W | HB | 13.9 | P_THB | 14.2 |
| 81 | M | HB | 14.2 | P_THB | 14.5 |

|    |   |    |      |       |      |
|----|---|----|------|-------|------|
| 63 | W | HB | 13.8 | P_THB | 14.1 |
| 43 | W | HB | 14.4 | P_THB | 14.7 |
| 62 | M | HB | 11.8 | P_THB | 12.1 |
| 83 | M | HB | 14.4 | P_THB | 14.7 |
| 76 | M | HB | 13.4 | P_THB | 13.7 |
| 18 | W | HB | 11.8 | P_THB | 12.1 |
| 26 | W | HB | 15.7 | P_THB | 16.0 |
| 37 | M | HB | 15.5 | P_THB | 15.8 |
| 16 | M | HB | 13.0 | P_THB | 13.3 |
| 82 | W | HB | 11.5 | P_THB | 11.2 |
| 30 | M | HB | 15.8 | P_THB | 16.1 |
| 78 | M | HB | 10.7 | P_THB | 11.0 |
| 66 | M | HB | 7.6  | P_THB | 7.9  |
| 35 | M | HB | 15.4 | P_THB | 15.7 |
| 69 | M | HB | 14.3 | P_THB | 14.6 |
| 46 | M | HB | 13.9 | P_THB | 14.2 |
| 56 | M | HB | 11.7 | P_THB | 12.0 |
| 63 | W | HB | 14.4 | P_THB | 14.7 |
| 59 | W | HB | 12.9 | P_THB | 13.2 |
| 33 | M | HB | 14.3 | P_THB | 14.0 |
| 83 | M | HB | 11.3 | P_THB | 11.6 |
| 92 | W | HB | 8.4  | P_THB | 8.7  |
| 52 | W | HB | 11.7 | P_THB | 12.0 |
| 62 | W | HB | 15.7 | P_THB | 16.0 |
| 55 | W | HB | 9.9  | P_THB | 10.2 |
| 72 | W | HB | 14.7 | P_THB | 15.0 |
| 86 | W | HB | 12.4 | P_THB | 12.7 |
| 40 | M | HB | 14.5 | P_THB | 14.8 |
| 82 | W | HB | 11.3 | P_THB | 11.6 |
| 60 | M | HB | 13.9 | P_THB | 14.2 |
| 44 | W | HB | 12.0 | P_THB | 11.7 |
| 25 | M | HB | 15.8 | P_THB | 16.1 |
| 83 | W | HB | 14.4 | P_THB | 14.7 |
| 90 | M | HB | 14.8 | P_THB | 15.1 |
| 72 | M | HB | 13.9 | P_THB | 14.2 |
| 34 | W | HB | 14.0 | P_THB | 14.3 |
| 65 | M | HB | 11.0 | P_THB | 11.3 |
| 51 | M | HB | 8.8  | P_THB | 9.1  |
| 91 | M | HB | 15.8 | P_THB | 16.1 |
| 84 | W | HB | 12.9 | P_THB | 13.2 |
| 60 | M | HB | 15.0 | P_THB | 15.3 |
| 64 | W | HB | 14.3 | P_THB | 14.0 |
| 29 | W | HB | 14.3 | P_THB | 14.6 |
| 88 | W | HB | 10.9 | P_THB | 11.2 |
| 57 | W | HB | 13.5 | P_THB | 13.8 |
| 94 | M | HB | 10.5 | P_THB | 10.8 |
| 70 | M | HB | 10.5 | P_THB | 10.8 |
| 38 | M | HB | 14.3 | P_THB | 14.0 |
| 24 | W | HB | 13.8 | P_THB | 14.1 |
| 55 | W | HB | 13.9 | P_THB | 14.2 |
| 68 | W | HB | 12.3 | P_THB | 12.6 |
| 26 | M | HB | 14.0 | P_THB | 14.3 |
| 37 | W | HB | 12.8 | P_THB | 13.1 |
| 84 | W | HB | 11.0 | P_THB | 10.7 |
| 49 | M | HB | 13.3 | P_THB | 13.6 |
| 41 | W | HB | 14.3 | P_THB | 14.6 |

|    |   |    |      |       |      |
|----|---|----|------|-------|------|
| 76 | W | HB | 12.2 | P_THB | 12.5 |
| 33 | W | HB | 14.3 | P_THB | 14.6 |
| 45 | W | HB | 13.2 | P_THB | 13.5 |
| 47 | W | HB | 9.0  | P_THB | 9.3  |
| 47 | M | HB | 13.8 | P_THB | 14.1 |
| 68 | W | HB | 13.0 | P_THB | 13.3 |
| 57 | M | HB | 13.3 | P_THB | 13.6 |
| 53 | M | HB | 9.5  | P_THB | 9.8  |
| 77 | M | HB | 14.0 | P_THB | 14.3 |
| 54 | M | HB | 9.1  | P_THB | 8.8  |
| 80 | M | HB | 12.2 | P_THB | 12.5 |
| 62 | M | HB | 14.8 | P_THB | 15.1 |
| 84 | W | HB | 12.7 | P_THB | 13.0 |
| 76 | M | HB | 15.0 | P_THB | 15.3 |
| 76 | M | HB | 11.2 | P_THB | 11.5 |
| 80 | W | HB | 13.4 | P_THB | 13.7 |
| 49 | W | HB | 11.8 | P_THB | 12.1 |
| 78 | M | HB | 12.8 | P_THB | 13.1 |
| 96 | W | HB | 11.7 | P_THB | 11.4 |
| 71 | M | HB | 11.5 | P_THB | 11.8 |
| 52 | W | HB | 13.0 | P_THB | 13.3 |
| 34 | W | HB | 14.7 | P_THB | 15.0 |
| 23 | M | HB | 14.7 | P_THB | 15.0 |
| 40 | W | HB | 12.8 | P_THB | 13.1 |
| 41 | M | HB | 13.9 | P_THB | 14.2 |
| 61 | M | HB | 14.9 | P_THB | 15.2 |
| 71 | W | HB | 7.4  | P_THB | 7.1  |
| 33 | M | HB | 9.8  | P_THB | 10.1 |
| 69 | M | HB | 14.2 | P_THB | 14.5 |
| 23 | W | HB | 13.5 | P_THB | 13.8 |
| 73 | W | HB | 7.8  | P_THB | 7.5  |
| 45 | M | HB | 16.4 | P_THB | 16.7 |
| 37 | M | HB | 15.9 | P_THB | 16.2 |
| 62 | M | HB | 15.9 | P_THB | 16.2 |
| 60 | M | HB | 16.4 | P_THB | 16.7 |
| 26 | M | HB | 16.6 | P_THB | 16.3 |
| 29 | M | HB | 16.3 | P_THB | 16.6 |
| 45 | M | HB | 16.4 | P_THB | 16.7 |
| 75 | M | HB | 14.6 | P_THB | 15.0 |
| 71 | W | HB | 13.5 | P_THB | 13.9 |
| 60 | M | HB | 15.5 | P_THB | 15.9 |
| 46 | M | HB | 15.3 | P_THB | 15.7 |
| 23 | W | HB | 14.5 | P_THB | 14.9 |
| 77 | M | HB | 14.8 | P_THB | 15.2 |
| 77 | W | HB | 12.7 | P_THB | 12.3 |
| 59 | M | HB | 16.5 | P_THB | 16.9 |
| 90 | W | HB | 11.0 | P_THB | 11.4 |
| 84 | M | HB | 16.2 | P_THB | 16.6 |
| 44 | W | HB | 12.0 | P_THB | 11.6 |
| 81 | W | HB | 13.4 | P_THB | 13.0 |
| 23 | W | HB | 13.3 | P_THB | 13.7 |
| 13 | W | HB | 12.8 | P_THB | 13.2 |
| 70 | M | HB | 11.0 | P_THB | 11.4 |
| 21 | M | HB | 15.6 | P_THB | 16.0 |
| 62 | W | HB | 14.5 | P_THB | 14.9 |
| 22 | W | HB | 11.8 | P_THB | 12.2 |

|    |   |    |      |       |      |
|----|---|----|------|-------|------|
| 60 | M | HB | 14.0 | P_THB | 14.4 |
| 75 | M | HB | 13.3 | P_THB | 13.7 |
| 83 | W | HB | 11.3 | P_THB | 11.7 |
| 83 | W | HB | 11.1 | P_THB | 11.5 |
| 56 | M | HB | 13.3 | P_THB | 13.7 |
| 64 | W | HB | 12.4 | P_THB | 12.0 |
| 21 | W | HB | 14.1 | P_THB | 14.5 |
| 76 | W | HB | 11.0 | P_THB | 11.4 |
| 74 | W | HB | 12.1 | P_THB | 12.5 |
| 26 | M | HB | 15.0 | P_THB | 15.4 |
| 67 | M | HB | 14.0 | P_THB | 14.4 |
| 61 | M | HB | 13.1 | P_THB | 13.5 |
| 51 | M | HB | 16.2 | P_THB | 16.6 |
| 21 | W | HB | 12.8 | P_THB | 13.2 |
| 74 | W | HB | 13.8 | P_THB | 14.2 |
| 45 | W | HB | 11.1 | P_THB | 11.5 |
| 43 | M | HB | 14.5 | P_THB | 14.9 |
| 39 | W | HB | 12.9 | P_THB | 12.5 |
| 75 | W | HB | 11.8 | P_THB | 12.2 |
| 41 | W | HB | 10.8 | P_THB | 11.2 |
| 93 | W | HB | 10.5 | P_THB | 10.1 |
| 48 | W | HB | 14.1 | P_THB | 14.5 |
| 48 | W | HB | 13.0 | P_THB | 13.4 |
| 56 | W | HB | 14.6 | P_THB | 15.0 |
| 65 | M | HB | 8.8  | P_THB | 9.2  |
| 75 | M | HB | 10.6 | P_THB | 11.0 |
| 59 | W | HB | 13.6 | P_THB | 14.0 |
| 62 | M | HB | 11.1 | P_THB | 11.5 |
| 43 | W | HB | 12.5 | P_THB | 12.9 |
| 32 | W | HB | 12.8 | P_THB | 13.2 |
| 41 | M | HB | 15.5 | P_THB | 15.9 |
| 88 | W | HB | 10.5 | P_THB | 10.9 |
| 81 | W | HB | 15.1 | P_THB | 15.5 |
| 75 | M | HB | 9.6  | P_THB | 10.0 |
| 86 | W | HB | 13.1 | P_THB | 13.5 |
| 83 | M | HB | 13.1 | P_THB | 13.5 |
| 82 | M | HB | 15.5 | P_THB | 15.9 |
| 96 | W | HB | 14.6 | P_THB | 15.0 |
| 30 | W | HB | 15.0 | P_THB | 15.4 |
| 74 | M | HB | 15.9 | P_THB | 16.3 |
| 57 | W | HB | 13.4 | P_THB | 13.0 |
| 79 | W | HB | 10.0 | P_THB | 10.4 |
| 23 | M | HB | 15.0 | P_THB | 15.4 |
| 83 | M | HB | 6.3  | P_THB | 6.7  |
| 36 | W | HB | 13.0 | P_THB | 13.4 |
| 59 | W | HB | 15.0 | P_THB | 15.4 |
| 83 | W | HB | 12.0 | P_THB | 12.4 |
| 55 | W | HB | 14.0 | P_THB | 13.6 |
| 72 | W | HB | 14.0 | P_THB | 14.4 |
| 25 | W | HB | 14.3 | P_THB | 14.7 |
| 66 | W | HB | 13.8 | P_THB | 14.2 |
| 57 | M | HB | 16.9 | P_THB | 17.3 |
| 83 | M | HB | 13.5 | P_THB | 13.9 |
| 23 | W | HB | 11.0 | P_THB | 11.4 |
| 24 | M | HB | 15.5 | P_THB | 15.9 |
| 58 | M | HB | 11.1 | P_THB | 11.5 |

|    |   |    |      |       |      |
|----|---|----|------|-------|------|
| 67 | M | HB | 10.8 | P_THB | 11.2 |
| 66 | W | HB | 11.6 | P_THB | 12.0 |
| 25 | W | HB | 10.3 | P_THB | 10.7 |
| 62 | M | HB | 9.0  | P_THB | 9.4  |
| 30 | W | HB | 13.3 | P_THB | 13.7 |
| 74 | W | HB | 14.0 | P_THB | 14.4 |
| 33 | M | HB | 16.4 | P_THB | 16.8 |
| 55 | M | HB | 14.5 | P_THB | 14.9 |
| 49 | M | HB | 17.1 | P_THB | 17.5 |
| 77 | W | HB | 11.8 | P_THB | 12.2 |
| 88 | M | HB | 17.8 | P_THB | 17.4 |
| 23 | M | HB | 15.9 | P_THB | 16.3 |
| 34 | M | HB | 13.6 | P_THB | 14.0 |
| 25 | W | HB | 10.8 | P_THB | 11.2 |
| 34 | M | HB | 9.5  | P_THB | 9.9  |
| 99 | W | HB | 11.1 | P_THB | 11.5 |
| 22 | M | HB | 15.1 | P_THB | 15.5 |
| 28 | W | HB | 10.0 | P_THB | 10.4 |
| 28 | W | HB | 10.0 | P_THB | 10.4 |
| 24 | W | HB | 14.0 | P_THB | 14.4 |
| 42 | M | HB | 14.6 | P_THB | 15.0 |
| 63 | W | HB | 12.9 | P_THB | 12.5 |
| 78 | W | HB | 15.9 | P_THB | 15.5 |
| 57 | W | HB | 13.8 | P_THB | 14.2 |
| 29 | W | HB | 13.1 | P_THB | 13.5 |
| 78 | M | HB | 14.1 | P_THB | 14.5 |
| 27 | W | HB | 14.5 | P_THB | 14.9 |
| 33 | M | HB | 13.6 | P_THB | 14.0 |
| 81 | M | HB | 11.8 | P_THB | 12.2 |
| 68 | W | HB | 14.0 | P_THB | 14.4 |
| 60 | M | HB | 14.1 | P_THB | 14.5 |
| 40 | M | HB | 15.6 | P_THB | 16.0 |
| 69 | M | HB | 12.6 | P_THB | 13.0 |
| 63 | M | HB | 15.9 | P_THB | 16.3 |
| 72 | M | HB | 8.5  | P_THB | 8.9  |
| 80 | M | HB | 16.1 | P_THB | 16.5 |
| 72 | M | HB | 8.9  | P_THB | 8.5  |
| 57 | M | HB | 13.5 | P_THB | 13.1 |
| 69 | W | HB | 15.0 | P_THB | 15.4 |
| 75 | M | HB | 11.8 | P_THB | 12.2 |
| 69 | M | HB | 12.6 | P_THB | 13.0 |
| 68 | M | HB | 13.6 | P_THB | 14.0 |
| 58 | W | HB | 13.6 | P_THB | 14.0 |
| 96 | W | HB | 13.4 | P_THB | 13.0 |
| 48 | M | HB | 13.8 | P_THB | 14.2 |
| 66 | W | HB | 14.1 | P_THB | 14.5 |
| 57 | W | HB | 14.3 | P_THB | 14.7 |
| 76 | M | HB | 11.5 | P_THB | 11.9 |
| 18 | W | HB | 11.3 | P_THB | 11.7 |
| 29 | W | HB | 14.1 | P_THB | 14.5 |
| 51 | W | HB | 15.1 | P_THB | 15.5 |
| 39 | W | HB | 11.1 | P_THB | 11.5 |
| 66 | W | HB | 11.8 | P_THB | 12.2 |
| 33 | W | HB | 10.6 | P_THB | 11.0 |
| 71 | M | HB | 14.3 | P_THB | 14.7 |
| 33 | M | HB | 14.0 | P_THB | 14.4 |

|    |   |    |      |       |      |
|----|---|----|------|-------|------|
| 65 | M | HB | 14.1 | P_THB | 14.5 |
| 40 | W | HB | 14.1 | P_THB | 14.5 |
| 46 | W | HB | 12.3 | P_THB | 12.7 |
| 44 | M | HB | 9.1  | P_THB | 9.5  |
| 40 | W | HB | 12.6 | P_THB | 13.0 |
| 67 | M | HB | 8.5  | P_THB | 8.1  |
| 18 | W | HB | 14.6 | P_THB | 15.0 |
| 37 | M | HB | 16.0 | P_THB | 16.4 |
| 86 | W | HB | 12.3 | P_THB | 12.7 |
| 69 | W | HB | 13.1 | P_THB | 13.5 |
| 56 | M | HB | 12.5 | P_THB | 12.9 |
| 44 | M | HB | 14.8 | P_THB | 15.2 |
| 55 | M | HB | 10.5 | P_THB | 10.9 |
| 72 | M | HB | 11.0 | P_THB | 11.4 |
| 43 | W | HB | 13.6 | P_THB | 14.0 |
| 23 | W | HB | 7.0  | P_THB | 7.4  |
| 64 | M | HB | 5.6  | P_THB | 5.2  |
| 83 | M | HB | 7.0  | P_THB | 7.4  |
| 83 | W | HB | 7.0  | P_THB | 7.4  |
| 74 | W | HB | 7.0  | P_THB | 6.6  |
| 77 | M | HB | 7.4  | P_THB | 7.8  |
| 67 | M | HB | 7.2  | P_THB | 7.6  |
| 84 | M | HB | 6.7  | P_THB | 7.1  |
| 89 | M | HB | 12.7 | P_THB | 13.1 |
| 24 | W | HB | 10.4 | P_THB | 10.8 |
| 20 | W | HB | 13.9 | P_THB | 14.3 |
| 76 | M | HB | 15.7 | P_THB | 16.1 |
| 83 | M | HB | 11.4 | P_THB | 11.8 |
| 26 | M | HB | 14.9 | P_THB | 15.3 |
| 76 | M | HB | 15.7 | P_THB | 16.1 |
| 37 | W | HB | 12.9 | P_THB | 13.3 |
| 22 | M | HB | 15.7 | P_THB | 16.1 |
| 62 | W | HB | 14.4 | P_THB | 14.8 |
| 36 | W | HB | 13.7 | P_THB | 14.1 |
| 79 | M | HB | 12.2 | P_THB | 12.6 |
| 77 | W | HB | 11.7 | P_THB | 12.1 |
| 71 | W | HB | 12.9 | P_THB | 13.3 |
| 26 | W | HB | 14.9 | P_THB | 15.3 |
| 23 | W | HB | 13.2 | P_THB | 13.6 |
| 59 | W | HB | 13.2 | P_THB | 13.6 |
| 60 | M | HB | 15.4 | P_THB | 15.8 |
| 22 | W | HB | 10.7 | P_THB | 11.1 |
| 81 | W | HB | 12.2 | P_THB | 12.6 |
| 79 | M | HB | 11.7 | P_THB | 12.1 |
| 50 | M | HB | 15.8 | P_THB | 16.2 |
| 64 | M | HB | 14.7 | P_THB | 15.1 |
| 30 | W | HB | 13.2 | P_THB | 13.6 |
| 74 | M | HB | 10.2 | P_THB | 10.6 |
| 51 | M | HB | 15.2 | P_THB | 15.6 |
| 59 | W | HB | 13.7 | P_THB | 14.1 |
| 75 | M | HB | 10.1 | P_THB | 9.7  |
| 84 | W | HB | 10.7 | P_THB | 11.1 |
| 20 | W | HB | 12.7 | P_THB | 13.1 |
| 68 | M | HB | 10.9 | P_THB | 11.3 |
| 33 | W | HB | 14.9 | P_THB | 15.3 |
| 58 | M | HB | 11.8 | P_THB | 11.4 |

|    |   |    |      |       |      |
|----|---|----|------|-------|------|
| 64 | W | HB | 11.9 | P_THB | 12.3 |
| 46 | W | HB | 14.7 | P_THB | 15.1 |
| 58 | W | HB | 9.2  | P_THB | 9.6  |
| 78 | M | HB | 13.7 | P_THB | 14.1 |
| 34 | W | HB | 14.2 | P_THB | 14.6 |
| 86 | W | HB | 14.2 | P_THB | 14.6 |
| 43 | M | HB | 14.4 | P_THB | 14.8 |
| 87 | W | HB | 13.9 | P_THB | 14.3 |
| 40 | W | HB | 13.2 | P_THB | 13.6 |
| 38 | W | HB | 10.7 | P_THB | 11.1 |
| 30 | M | HB | 15.2 | P_THB | 15.6 |
| 77 | M | HB | 14.9 | P_THB | 15.3 |
| 80 | W | HB | 12.7 | P_THB | 13.1 |
| 31 | M | HB | 15.2 | P_THB | 15.6 |
| 53 | M | HB | 12.9 | P_THB | 13.3 |
| 89 | M | HB | 16.1 | P_THB | 15.7 |
| 39 | W | HB | 13.2 | P_THB | 13.6 |
| 47 | W | HB | 13.9 | P_THB | 14.3 |
| 79 | W | HB | 9.9  | P_THB | 10.3 |
| 75 | M | HB | 13.2 | P_THB | 13.6 |
| 56 | W | HB | 12.4 | P_THB | 12.8 |
| 23 | W | HB | 13.7 | P_THB | 14.1 |
| 39 | W | HB | 11.7 | P_THB | 12.1 |
| 87 | W | HB | 8.4  | P_THB | 8.8  |
| 25 | W | HB | 10.9 | P_THB | 11.3 |
| 63 | W | HB | 13.1 | P_THB | 12.7 |
| 76 | M | HB | 12.7 | P_THB | 13.1 |
| 74 | W | HB | 10.9 | P_THB | 11.3 |
| 27 | M | HB | 15.8 | P_THB | 16.2 |
| 75 | W | HB | 14.9 | P_THB | 15.3 |
| 77 | M | HB | 14.4 | P_THB | 14.8 |
| 29 | M | HB | 15.7 | P_THB | 16.1 |
| 25 | M | HB | 14.9 | P_THB | 15.3 |
| 66 | M | HB | 8.4  | P_THB | 8.8  |
| 50 | M | HB | 15.7 | P_THB | 16.1 |
| 39 | W | HB | 12.4 | P_THB | 12.8 |
| 47 | M | HB | 14.9 | P_THB | 15.3 |
| 22 | M | HB | 11.4 | P_THB | 11.8 |
| 74 | M | HB | 14.4 | P_THB | 14.8 |
| 48 | M | HB | 14.9 | P_THB | 15.3 |
| 60 | W | HB | 13.7 | P_THB | 14.1 |
| 82 | M | HB | 10.9 | P_THB | 11.3 |
| 60 | W | HB | 13.9 | P_THB | 14.3 |
| 58 | M | HB | 15.1 | P_THB | 14.7 |
| 51 | W | HB | 14.2 | P_THB | 14.6 |
| 31 | W | HB | 9.2  | P_THB | 9.6  |
| 70 | W | HB | 10.4 | P_THB | 10.8 |
| 53 | M | HB | 12.8 | P_THB | 12.4 |
| 50 | M | HB | 13.9 | P_THB | 14.3 |
| 56 | W | HB | 11.2 | P_THB | 11.6 |
| 28 | M | HB | 15.2 | P_THB | 15.6 |
| 88 | M | HB | 11.4 | P_THB | 11.8 |
| 66 | M | HB | 13.6 | P_THB | 13.2 |
| 64 | W | HB | 12.9 | P_THB | 13.3 |
| 19 | W | HB | 13.2 | P_THB | 13.6 |
| 23 | W | HB | 12.4 | P_THB | 12.8 |



|    |   |    |      |       |      |
|----|---|----|------|-------|------|
| 45 | M | HB | 13.9 | P_THB | 14.3 |
| 83 | M | HB | 11.4 | P_THB | 11.8 |
| 78 | W | HB | 11.7 | P_THB | 12.1 |
| 19 | M | HB | 15.8 | P_THB | 16.2 |
| 27 | M | HB | 14.9 | P_THB | 15.3 |
| 62 | M | HB | 14.2 | P_THB | 14.6 |
| 63 | W | HB | 13.7 | P_THB | 14.1 |
| 89 | W | HB | 9.9  | P_THB | 10.3 |
| 63 | M | HB | 15.8 | P_THB | 16.3 |
| 53 | W | HB | 15.8 | P_THB | 16.3 |
| 57 | W | HB | 15.8 | P_THB | 16.3 |
| 17 | M | HB | 15.8 | P_THB | 16.3 |
| 25 | M | HB | 15.8 | P_THB | 16.3 |
| 33 | M | HB | 15.8 | P_THB | 16.3 |
| 62 | M | HB | 8.4  | P_THB | 7.9  |
| 50 | W | HB | 7.9  | P_THB | 8.4  |
| 71 | W | HB | 10.9 | P_THB | 11.4 |
| 74 | M | HB | 16.4 | P_THB | 16.9 |
| 86 | M | HB | 13.1 | P_THB | 13.6 |
| 59 | M | HB | 14.7 | P_THB | 15.2 |
| 68 | W | HB | 13.9 | P_THB | 14.4 |
| 38 | M | HB | 16.0 | P_THB | 16.5 |
| 93 | M | HB | 13.6 | P_THB | 13.1 |
| 32 | W | HB | 14.4 | P_THB | 14.9 |
| 60 | W | HB | 12.8 | P_THB | 13.3 |
| 40 | M | HB | 13.9 | P_THB | 14.4 |
| 25 | M | HB | 14.0 | P_THB | 14.5 |
| 79 | W | HB | 15.3 | P_THB | 15.8 |
| 47 | W | HB | 11.0 | P_THB | 11.5 |
| 44 | M | HB | 8.5  | P_THB | 9.0  |
| 61 | M | HB | 13.3 | P_THB | 12.8 |
| 53 | M | HB | 14.3 | P_THB | 14.8 |
| 73 | W | HB | 12.6 | P_THB | 13.1 |
| 62 | W | HB | 11.8 | P_THB | 12.3 |
| 50 | M | HB | 12.9 | P_THB | 13.4 |
| 65 | M | HB | 14.8 | P_THB | 15.3 |
| 82 | W | HB | 10.8 | P_THB | 10.3 |
| 70 | M | HB | 12.6 | P_THB | 13.1 |
| 35 | W | HB | 15.3 | P_THB | 15.8 |
| 28 | M | HB | 14.3 | P_THB | 14.8 |
| 56 | W | HB | 12.8 | P_THB | 13.3 |
| 75 | W | HB | 14.1 | P_THB | 13.6 |
| 48 | M | HB | 12.4 | P_THB | 12.9 |
| 19 | M | HB | 15.5 | P_THB | 16.0 |
| 28 | M | HB | 16.1 | P_THB | 16.6 |
| 45 | W | HB | 13.8 | P_THB | 14.3 |
| 64 | W | HB | 14.7 | P_THB | 15.2 |
| 83 | M | HB | 13.1 | P_THB | 13.6 |
| 60 | M | HB | 14.3 | P_THB | 14.8 |
| 57 | M | HB | 11.7 | P_THB | 12.2 |
| 71 | W | HB | 11.5 | P_THB | 12.0 |
| 47 | M | HB | 14.6 | P_THB | 15.1 |
| 66 | W | HB | 13.1 | P_THB | 13.6 |
| 24 | M | HB | 15.1 | P_THB | 14.6 |
| 28 | W | HB | 11.5 | P_THB | 12.0 |
| 75 | W | HB | 9.8  | P_THB | 10.3 |

|    |   |    |      |       |      |
|----|---|----|------|-------|------|
| 77 | W | HB | 13.1 | P_THB | 13.6 |
| 71 | M | HB | 10.8 | P_THB | 11.3 |
| 36 | M | HB | 14.8 | P_THB | 15.3 |
| 59 | M | HB | 14.4 | P_THB | 13.9 |
| 30 | W | HB | 13.2 | P_THB | 13.7 |
| 79 | M | HB | 14.1 | P_THB | 14.6 |
| 61 | M | HB | 11.6 | P_THB | 12.1 |
| 20 | W | HB | 14.4 | P_THB | 13.9 |
| 60 | M | HB | 14.2 | P_THB | 14.7 |
| 63 | M | HB | 13.7 | P_THB | 14.2 |
| 44 | W | HB | 14.2 | P_THB | 14.7 |
| 40 | M | HB | 15.3 | P_THB | 15.8 |
| 48 | M | HB | 14.6 | P_THB | 15.1 |
| 39 | W | HB | 10.9 | P_THB | 11.4 |
| 64 | M | HB | 10.5 | P_THB | 11.0 |
| 57 | M | HB | 16.1 | P_THB | 15.6 |
| 61 | M | HB | 14.6 | P_THB | 15.1 |
| 72 | W | HB | 14.0 | P_THB | 14.5 |
| 35 | M | HB | 15.3 | P_THB | 15.8 |
| 87 | W | HB | 14.3 | P_THB | 14.8 |
| 44 | W | HB | 13.0 | P_THB | 13.5 |
| 61 | M | HB | 14.8 | P_THB | 15.3 |
| 65 | W | HB | 12.0 | P_THB | 11.5 |
| 28 | W | HB | 12.8 | P_THB | 12.3 |
| 52 | M | HB | 16.8 | P_THB | 17.3 |
| 83 | W | HB | 13.1 | P_THB | 13.6 |
| 69 | W | HB | 14.5 | P_THB | 15.0 |
| 84 | M | HB | 13.1 | P_THB | 12.6 |
| 85 | M | HB | 11.0 | P_THB | 11.5 |
| 20 | W | HB | 11.9 | P_THB | 11.4 |
| 50 | W | HB | 13.5 | P_THB | 14.0 |
| 51 | W | HB | 13.2 | P_THB | 13.7 |
| 61 | W | HB | 12.3 | P_THB | 12.8 |
| 36 | M | HB | 15.9 | P_THB | 16.4 |
| 67 | M | HB | 13.1 | P_THB | 13.6 |
| 49 | M | HB | 16.5 | P_THB | 17.0 |
| 60 | M | HB | 14.5 | P_THB | 15.0 |
| 45 | M | HB | 11.8 | P_THB | 12.3 |
| 70 | M | HB | 13.6 | P_THB | 14.1 |
| 54 | W | HB | 14.3 | P_THB | 14.8 |
| 38 | M | HB | 15.2 | P_THB | 15.7 |
| 63 | M | HB | 14.4 | P_THB | 14.9 |
| 80 | M | HB | 12.3 | P_THB | 12.8 |
| 21 | W | HB | 14.4 | P_THB | 14.9 |
| 28 | M | HB | 15.4 | P_THB | 15.9 |
| 41 | W | HB | 13.1 | P_THB | 12.6 |
| 66 | M | HB | 13.7 | P_THB | 14.2 |
| 32 | M | HB | 14.0 | P_THB | 14.5 |
| 38 | M | HB | 15.4 | P_THB | 15.9 |
| 85 | M | HB | 15.2 | P_THB | 15.7 |
| 84 | W | HB | 9.1  | P_THB | 9.6  |
| 94 | M | HB | 11.4 | P_THB | 10.9 |
| 53 | W | HB | 12.2 | P_THB | 12.7 |
| 55 | M | HB | 11.6 | P_THB | 12.1 |
| 19 | W | HB | 14.4 | P_THB | 14.9 |
| 73 | M | HB | 15.1 | P_THB | 15.6 |

|    |   |    |      |       |      |
|----|---|----|------|-------|------|
| 65 | W | HB | 9.3  | P_THB | 9.8  |
| 57 | W | HB | 9.7  | P_THB | 10.2 |
| 52 | M | HB | 14.2 | P_THB | 14.7 |
| 75 | W | HB | 11.1 | P_THB | 11.6 |
| 58 | M | HB | 6.1  | P_THB | 6.6  |
| 36 | M | HB | 13.8 | P_THB | 14.3 |
| 25 | W | HB | 12.6 | P_THB | 13.1 |
| 85 | M | HB | 15.2 | P_THB | 15.7 |
| 65 | M | HB | 13.9 | P_THB | 14.4 |
| 93 | W | HB | 13.5 | P_THB | 14.0 |
| 63 | W | HB | 14.1 | P_THB | 14.6 |
| 82 | W | HB | 12.4 | P_THB | 12.9 |
| 33 | M | HB | 14.0 | P_THB | 13.5 |
| 68 | W | HB | 13.4 | P_THB | 13.9 |
| 74 | W | HB | 13.9 | P_THB | 14.4 |
| 39 | W | HB | 12.6 | P_THB | 13.1 |
| 61 | W | HB | 13.9 | P_THB | 14.4 |
| 44 | M | HB | 14.0 | P_THB | 14.5 |
| 41 | W | HB | 14.1 | P_THB | 14.6 |
| 47 | M | HB | 14.0 | P_THB | 14.5 |
| 70 | W | HB | 12.3 | P_THB | 12.8 |
| 53 | W | HB | 13.9 | P_THB | 14.4 |
| 72 | W | HB | 12.0 | P_THB | 12.5 |
| 39 | M | HB | 12.3 | P_THB | 12.8 |
| 61 | W | HB | 13.2 | P_THB | 13.7 |
| 81 | M | HB | 14.2 | P_THB | 14.7 |
| 64 | W | HB | 13.7 | P_THB | 14.2 |
| 84 | W | HB | 10.5 | P_THB | 11.0 |
| 17 | M | HB | 16.0 | P_THB | 16.5 |
| 21 | W | HB | 14.8 | P_THB | 15.3 |
| 29 | W | HB | 12.7 | P_THB | 13.2 |
| 21 | W | HB | 12.9 | P_THB | 13.4 |
| 70 | W | HB | 13.4 | P_THB | 13.9 |
| 44 | M | HB | 14.7 | P_THB | 15.2 |
| 50 | M | HB | 10.9 | P_THB | 11.4 |
| 44 | M | HB | 15.6 | P_THB | 16.1 |
| 68 | M | HB | 16.0 | P_THB | 16.5 |
| 62 | W | HB | 12.9 | P_THB | 13.4 |
| 53 | M | HB | 14.3 | P_THB | 14.8 |
| 40 | W | HB | 11.8 | P_THB | 12.3 |
| 69 | M | HB | 15.0 | P_THB | 15.5 |
| 78 | W | HB | 13.3 | P_THB | 13.8 |
| 75 | M | HB | 14.6 | P_THB | 15.1 |
| 54 | W | HB | 14.5 | P_THB | 15.0 |
| 22 | W | HB | 14.2 | P_THB | 14.7 |
| 53 | M | HB | 13.6 | P_THB | 14.1 |
| 74 | M | HB | 16.6 | P_THB | 17.1 |
| 58 | M | HB | 13.4 | P_THB | 13.9 |
| 82 | M | HB | 10.3 | P_THB | 10.8 |
| 68 | M | HB | 13.1 | P_THB | 13.6 |
| 52 | W | HB | 11.8 | P_THB | 12.3 |
| 74 | M | HB | 12.2 | P_THB | 12.7 |
| 52 | M | HB | 13.5 | P_THB | 14.0 |
| 78 | W | HB | 16.5 | P_THB | 17.0 |
| 51 | M | HB | 13.2 | P_THB | 13.7 |
| 35 | M | HB | 8.7  | P_THB | 9.2  |

|    |   |    |      |       |      |
|----|---|----|------|-------|------|
| 74 | M | HB | 14.9 | P_THB | 14.4 |
| 44 | W | HB | 11.6 | P_THB | 12.1 |
| 61 | M | HB | 15.4 | P_THB | 14.9 |
| 58 | W | HB | 8.6  | P_THB | 9.1  |
| 69 | W | HB | 14.0 | P_THB | 14.5 |
| 81 | M | HB | 13.1 | P_THB | 13.6 |
| 34 | M | HB | 12.4 | P_THB | 12.9 |
| 88 | W | HB | 11.7 | P_THB | 12.2 |
| 43 | M | HB | 13.1 | P_THB | 13.6 |
| 54 | M | HB | 15.5 | P_THB | 16.0 |
| 67 | W | HB | 13.9 | P_THB | 14.4 |
| 36 | M | HB | 13.1 | P_THB | 13.6 |
| 15 | W | HB | 14.5 | P_THB | 15.0 |
| 49 | W | HB | 12.1 | P_THB | 12.6 |
| 50 | W | HB | 14.1 | P_THB | 14.6 |
| 77 | M | HB | 11.2 | P_THB | 11.7 |
| 47 | M | HB | 14.8 | P_THB | 15.3 |
| 87 | W | HB | 11.6 | P_THB | 12.1 |
| 27 | W | HB | 13.1 | P_THB | 13.6 |
| 70 | M | HB | 14.5 | P_THB | 15.0 |
| 20 | M | HB | 18.0 | P_THB | 18.5 |
| 36 | M | HB | 16.3 | P_THB | 16.8 |
| 47 | M | HB | 14.9 | P_THB | 15.4 |
| 67 | M | HB | 14.9 | P_THB | 15.4 |
| 78 | W | HB | 14.2 | P_THB | 13.7 |
| 80 | W | HB | 11.1 | P_THB | 10.6 |
| 24 | W | HB | 12.3 | P_THB | 12.8 |
| 30 | M | HB | 15.1 | P_THB | 15.6 |
| 22 | M | HB | 16.2 | P_THB | 16.7 |
| 57 | M | HB | 15.0 | P_THB | 15.5 |
| 18 | W | HB | 13.5 | P_THB | 14.0 |
| 46 | M | HB | 15.5 | P_THB | 16.0 |
| 23 | M | HB | 13.8 | P_THB | 14.3 |
| 73 | M | HB | 14.3 | P_THB | 13.8 |
| 56 | M | HB | 15.5 | P_THB | 16.0 |
| 89 | W | HB | 12.0 | P_THB | 11.5 |
| 46 | M | HB | 16.1 | P_THB | 15.6 |
| 52 | W | HB | 9.6  | P_THB | 10.1 |
| 24 | M | HB | 14.8 | P_THB | 15.3 |
| 68 | M | HB | 15.2 | P_THB | 15.7 |
| 39 | W | HB | 13.5 | P_THB | 14.0 |
| 50 | M | HB | 16.3 | P_THB | 16.8 |
| 66 | W | HB | 12.5 | P_THB | 13.0 |
| 47 | M | HB | 14.8 | P_THB | 14.3 |
| 43 | W | HB | 13.7 | P_THB | 14.2 |
| 25 | W | HB | 14.8 | P_THB | 15.3 |
| 60 | W | HB | 12.1 | P_THB | 12.6 |
| 32 | W | HB | 12.3 | P_THB | 12.8 |
| 77 | W | HB | 13.1 | P_THB | 13.6 |
| 43 | M | HB | 15.5 | P_THB | 16.0 |
| 63 | M | HB | 13.4 | P_THB | 12.9 |
| 80 | M | HB | 11.8 | P_THB | 12.3 |
| 80 | M | HB | 15.2 | P_THB | 15.7 |
| 73 | M | HB | 10.6 | P_THB | 11.1 |
| 60 | W | HB | 10.9 | P_THB | 11.4 |
| 53 | M | HB | 11.2 | P_THB | 11.7 |

|    |   |    |      |       |      |
|----|---|----|------|-------|------|
| 48 | W | HB | 12.6 | P_THB | 13.1 |
| 75 | W | HB | 13.1 | P_THB | 13.6 |
| 35 | W | HB | 13.7 | P_THB | 14.2 |
| 46 | M | HB | 14.8 | P_THB | 15.3 |
| 61 | M | HB | 13.4 | P_THB | 13.9 |
| 57 | W | HB | 12.3 | P_THB | 12.8 |
| 31 | W | HB | 13.9 | P_THB | 14.4 |
| 49 | M | HB | 16.0 | P_THB | 16.5 |
| 69 | W | HB | 15.9 | P_THB | 16.4 |
| 83 | W | HB | 10.2 | P_THB | 9.7  |
| 62 | M | HB | 14.0 | P_THB | 14.5 |
| 68 | W | HB | 9.5  | P_THB | 10.0 |
| 67 | M | HB | 14.7 | P_THB | 15.2 |
| 21 | W | HB | 12.9 | P_THB | 13.4 |
| 85 | M | HB | 12.0 | P_THB | 12.5 |
| 58 | M | HB | 11.5 | P_THB | 11.0 |
| 60 | W | HB | 9.2  | P_THB | 9.7  |
| 76 | M | HB | 13.7 | P_THB | 14.2 |
| 33 | W | HB | 12.1 | P_THB | 12.6 |
| 72 | M | HB | 7.5  | P_THB | 8.0  |
| 67 | M | HB | 14.3 | P_THB | 14.8 |
| 48 | W | HB | 12.0 | P_THB | 12.5 |
| 31 | M | HB | 14.9 | P_THB | 15.4 |
| 52 | W | HB | 14.9 | P_THB | 15.4 |
| 41 | M | HB | 12.8 | P_THB | 13.3 |
| 14 | M | HB | 15.3 | P_THB | 15.8 |
| 64 | M | HB | 15.5 | P_THB | 16.0 |
| 47 | M | HB | 9.3  | P_THB | 9.8  |
| 75 | W | HB | 13.0 | P_THB | 13.5 |
| 69 | W | HB | 9.7  | P_THB | 10.2 |
| 85 | W | HB | 12.3 | P_THB | 12.8 |
| 55 | M | HB | 8.3  | P_THB | 8.8  |
| 24 | M | HB | 15.0 | P_THB | 15.5 |
| 93 | W | HB | 13.0 | P_THB | 12.5 |
| 48 | M | HB | 16.3 | P_THB | 16.8 |
| 56 | W | HB | 12.9 | P_THB | 13.4 |
| 21 | W | HB | 13.1 | P_THB | 13.6 |
| 90 | M | HB | 10.9 | P_THB | 11.4 |
| 32 | W | HB | 12.4 | P_THB | 12.9 |
| 48 | M | HB | 14.7 | P_THB | 15.2 |
| 20 | W | HB | 13.3 | P_THB | 13.8 |
| 68 | M | HB | 12.4 | P_THB | 12.9 |
| 40 | W | HB | 13.8 | P_THB | 14.3 |
| 72 | M | HB | 15.1 | P_THB | 15.6 |
| 70 | M | HB | 11.7 | P_THB | 12.2 |
| 92 | W | HB | 8.4  | P_THB | 8.9  |
| 82 | W | HB | 13.3 | P_THB | 13.8 |
| 78 | M | HB | 10.3 | P_THB | 10.8 |
| 24 | W | HB | 13.8 | P_THB | 14.3 |
| 64 | M | HB | 11.8 | P_THB | 12.3 |
| 74 | M | HB | 15.0 | P_THB | 15.5 |
| 44 | M | HB | 14.5 | P_THB | 15.0 |
| 28 | W | HB | 13.4 | P_THB | 13.9 |
| 67 | M | HB | 8.1  | P_THB | 8.6  |
| 37 | M | HB | 15.4 | P_THB | 15.9 |
| 44 | M | HB | 13.9 | P_THB | 14.4 |

|    |   |    |      |       |      |
|----|---|----|------|-------|------|
| 57 | W | HB | 12.2 | P_THB | 12.7 |
| 82 | W | HB | 12.0 | P_THB | 12.5 |
| 73 | M | HB | 12.0 | P_THB | 12.5 |
| 70 | W | HB | 10.6 | P_THB | 11.1 |
| 49 | M | HB | 13.2 | P_THB | 13.7 |
| 57 | M | HB | 9.1  | P_THB | 9.6  |
| 56 | M | HB | 12.4 | P_THB | 12.9 |
| 48 | W | HB | 10.0 | P_THB | 10.5 |
| 78 | M | HB | 11.4 | P_THB | 11.9 |
| 78 | M | HB | 10.8 | P_THB | 11.3 |
| 32 | M | HB | 16.1 | P_THB | 16.6 |
| 88 | W | HB | 12.6 | P_THB | 13.1 |
| 50 | W | HB | 14.2 | P_THB | 14.7 |
| 79 | W | HB | 13.7 | P_THB | 14.2 |
| 87 | M | HB | 13.8 | P_THB | 13.3 |
| 60 | W | HB | 14.9 | P_THB | 15.4 |
| 61 | M | HB | 15.3 | P_THB | 15.8 |
| 64 | M | HB | 13.1 | P_THB | 13.6 |
| 84 | W | HB | 11.4 | P_THB | 11.9 |
| 56 | M | HB | 17.4 | P_THB | 17.9 |
| 19 | W | HB | 12.3 | P_THB | 12.8 |
| 24 | W | HB | 12.9 | P_THB | 13.4 |
| 57 | M | HB | 11.0 | P_THB | 11.5 |
| 67 | M | HB | 13.4 | P_THB | 12.9 |
| 22 | M | HB | 14.8 | P_THB | 15.3 |
| 36 | W | HB | 13.4 | P_THB | 13.9 |
| 74 | W | HB | 9.3  | P_THB | 9.8  |
| 74 | M | HB | 13.3 | P_THB | 13.8 |
| 90 | W | HB | 11.8 | P_THB | 12.3 |
| 62 | M | HB | 15.6 | P_THB | 16.1 |
| 76 | M | HB | 11.8 | P_THB | 12.3 |
| 36 | W | HB | 13.2 | P_THB | 13.7 |
| 52 | M | HB | 12.7 | P_THB | 13.2 |
| 60 | W | HB | 13.7 | P_THB | 14.2 |
| 55 | W | HB | 12.8 | P_THB | 13.3 |
| 80 | W | HB | 14.5 | P_THB | 15.0 |
| 92 | W | HB | 13.7 | P_THB | 14.2 |
| 88 | W | HB | 12.5 | P_THB | 13.0 |
| 39 | M | HB | 14.6 | P_THB | 15.1 |
| 80 | W | HB | 13.0 | P_THB | 13.5 |
| 43 | M | HB | 16.0 | P_THB | 16.5 |
| 40 | W | HB | 12.8 | P_THB | 13.3 |
| 93 | W | HB | 8.1  | P_THB | 8.6  |
| 73 | M | HB | 15.2 | P_THB | 15.7 |
| 42 | M | HB | 12.7 | P_THB | 12.2 |
| 33 | M | HB | 14.9 | P_THB | 15.4 |
| 86 | W | HB | 12.5 | P_THB | 13.0 |
| 52 | M | HB | 9.8  | P_THB | 10.3 |
| 53 | W | HB | 13.4 | P_THB | 13.9 |
| 22 | M | HB | 14.7 | P_THB | 15.2 |
| 60 | M | HB | 14.9 | P_THB | 15.4 |
| 21 | W | HB | 12.9 | P_THB | 13.4 |
| 19 | W | HB | 13.5 | P_THB | 14.0 |
| 42 | W | HB | 13.6 | P_THB | 14.1 |
| 93 | W | HB | 9.2  | P_THB | 9.7  |
| 63 | M | HB | 10.8 | P_THB | 11.3 |

|    |   |    |      |       |      |
|----|---|----|------|-------|------|
| 84 | M | HB | 11.2 | P_THB | 11.7 |
| 74 | W | HB | 7.6  | P_THB | 8.1  |
| 60 | W | HB | 16.2 | P_THB | 15.7 |
| 25 | M | HB | 15.7 | P_THB | 16.2 |
| 53 | M | HB | 15.7 | P_THB | 16.2 |
| 31 | M | HB | 15.7 | P_THB | 16.2 |
| 74 | M | HB | 16.7 | P_THB | 17.3 |
| 58 | M | HB | 16.2 | P_THB | 16.8 |
| 36 | M | HB | 16.7 | P_THB | 17.3 |
| 70 | M | HB | 16.7 | P_THB | 17.3 |
| 53 | M | HB | 16.7 | P_THB | 17.3 |
| 37 | M | HB | 16.2 | P_THB | 16.8 |
| 28 | M | HB | 16.2 | P_THB | 16.8 |
| 57 | M | HB | 12.8 | P_THB | 13.4 |
| 55 | M | HB | 11.1 | P_THB | 11.7 |
| 34 | W | HB | 13.6 | P_THB | 14.2 |
| 70 | M | HB | 12.1 | P_THB | 12.7 |
| 57 | W | HB | 11.3 | P_THB | 11.9 |
| 85 | W | HB | 12.6 | P_THB | 13.2 |
| 89 | W | HB | 15.3 | P_THB | 15.9 |
| 57 | M | HB | 15.1 | P_THB | 15.7 |
| 91 | W | HB | 13.3 | P_THB | 13.9 |
| 58 | M | HB | 12.6 | P_THB | 13.2 |
| 68 | M | HB | 10.3 | P_THB | 10.9 |
| 26 | M | HB | 15.7 | P_THB | 16.3 |
| 37 | W | HB | 12.1 | P_THB | 12.7 |
| 26 | W | HB | 13.8 | P_THB | 14.4 |
| 16 | M | HB | 13.8 | P_THB | 14.4 |
| 36 | W | HB | 13.1 | P_THB | 13.7 |
| 64 | M | HB | 14.7 | P_THB | 14.1 |
| 75 | M | HB | 14.8 | P_THB | 15.4 |
| 72 | M | HB | 10.6 | P_THB | 11.2 |
| 70 | M | HB | 15.7 | P_THB | 16.3 |
| 35 | M | HB | 14.3 | P_THB | 14.9 |
| 30 | W | HB | 13.8 | P_THB | 14.4 |
| 60 | M | HB | 14.3 | P_THB | 14.9 |
| 36 | M | HB | 14.8 | P_THB | 15.4 |
| 58 | M | HB | 14.8 | P_THB | 15.4 |
| 87 | M | HB | 12.8 | P_THB | 13.4 |
| 75 | M | HB | 12.3 | P_THB | 12.9 |
| 56 | M | HB | 16.3 | P_THB | 15.7 |
| 24 | W | HB | 15.3 | P_THB | 15.9 |
| 75 | M | HB | 12.8 | P_THB | 13.4 |
| 78 | M | HB | 14.3 | P_THB | 14.9 |
| 47 | M | HB | 12.8 | P_THB | 13.4 |
| 39 | M | HB | 13.6 | P_THB | 14.2 |
| 80 | W | HB | 12.6 | P_THB | 13.2 |
| 73 | M | HB | 12.8 | P_THB | 13.4 |
| 61 | M | HB | 12.3 | P_THB | 12.9 |
| 42 | M | HB | 13.6 | P_THB | 14.2 |
| 50 | M | HB | 15.8 | P_THB | 16.4 |
| 75 | M | HB | 14.6 | P_THB | 15.2 |
| 39 | M | HB | 13.8 | P_THB | 14.4 |
| 74 | W | HB | 13.4 | P_THB | 12.8 |
| 23 | W | HB | 9.6  | P_THB | 10.2 |
| 7  | M | HB | 12.3 | P_THB | 12.9 |

|    |   |    |      |       |      |
|----|---|----|------|-------|------|
| 99 | W | HB | 11.3 | P_THB | 11.9 |
| 91 | W | HB | 10.8 | P_THB | 11.4 |
| 60 | W | HB | 8.6  | P_THB | 9.2  |
| 79 | M | HB | 14.1 | P_THB | 14.7 |
| 38 | W | HB | 14.8 | P_THB | 15.4 |
| 50 | M | HB | 15.1 | P_THB | 15.7 |
| 75 | W | HB | 8.8  | P_THB | 9.4  |
| 49 | W | HB | 14.1 | P_THB | 14.7 |
| 84 | M | HB | 13.6 | P_THB | 14.2 |
| 72 | M | HB | 11.1 | P_THB | 11.7 |
| 25 | W | HB | 12.6 | P_THB | 13.2 |
| 27 | W | HB | 10.8 | P_THB | 11.4 |
| 75 | W | HB | 13.8 | P_THB | 14.4 |
| 30 | M | HB | 15.7 | P_THB | 15.1 |
| 69 | M | HB | 14.3 | P_THB | 14.9 |
| 78 | W | HB | 12.1 | P_THB | 12.7 |
| 49 | W | HB | 13.6 | P_THB | 14.2 |
| 50 | W | HB | 15.4 | P_THB | 14.8 |
| 78 | W | HB | 12.1 | P_THB | 12.7 |
| 63 | M | HB | 14.3 | P_THB | 14.9 |
| 19 | W | HB | 11.3 | P_THB | 11.9 |
| 21 | M | HB | 14.6 | P_THB | 15.2 |
| 22 | W | HB | 14.1 | P_THB | 14.7 |
| 49 | M | HB | 15.1 | P_THB | 15.7 |
| 77 | M | HB | 13.1 | P_THB | 13.7 |
| 57 | W | HB | 13.6 | P_THB | 14.2 |
| 74 | W | HB | 15.7 | P_THB | 16.3 |
| 28 | M | HB | 15.8 | P_THB | 16.4 |
| 51 | M | HB | 12.6 | P_THB | 13.2 |
| 41 | M | HB | 14.8 | P_THB | 15.4 |
| 42 | M | HB | 14.1 | P_THB | 14.7 |
| 72 | W | HB | 11.3 | P_THB | 11.9 |
| 83 | W | HB | 9.7  | P_THB | 9.1  |
| 29 | M | HB | 14.8 | P_THB | 15.4 |
| 59 | M | HB | 13.6 | P_THB | 14.2 |
| 57 | W | HB | 11.8 | P_THB | 12.4 |
| 84 | M | HB | 13.6 | P_THB | 14.2 |
| 83 | W | HB | 14.8 | P_THB | 15.4 |
| 77 | M | HB | 13.7 | P_THB | 13.1 |
| 20 | W | HB | 12.3 | P_THB | 12.9 |
| 52 | W | HB | 12.1 | P_THB | 12.7 |
| 50 | W | HB | 12.6 | P_THB | 13.2 |
| 85 | M | HB | 14.6 | P_THB | 15.2 |
| 50 | W | HB | 12.8 | P_THB | 13.4 |
| 53 | W | HB | 12.3 | P_THB | 12.9 |
| 16 | M | HB | 14.8 | P_THB | 15.4 |
| 28 | W | HB | 13.2 | P_THB | 12.6 |
| 43 | M | HB | 12.8 | P_THB | 13.4 |
| 80 | M | HB | 11.6 | P_THB | 12.2 |
| 55 | M | HB | 14.8 | P_THB | 15.4 |
| 55 | M | HB | 13.3 | P_THB | 13.9 |
| 62 | M | HB | 12.8 | P_THB | 13.4 |
| 85 | W | HB | 10.6 | P_THB | 11.2 |
| 48 | M | HB | 12.8 | P_THB | 13.4 |
| 28 | W | HB | 12.1 | P_THB | 12.7 |
| 42 | M | HB | 7.8  | P_THB | 8.4  |



|    |   |    |      |       |      |
|----|---|----|------|-------|------|
| 82 | M | HB | 9.6  | P_THB | 10.2 |
| 90 | W | HB | 10.8 | P_THB | 11.4 |
| 60 | W | HB | 11.1 | P_THB | 11.7 |
| 39 | M | HB | 14.7 | P_THB | 14.1 |
| 58 | M | HB | 16.4 | P_THB | 15.8 |
| 86 | W | HB | 12.1 | P_THB | 12.7 |
| 44 | W | HB | 11.8 | P_THB | 12.4 |
| 47 | M | HB | 13.8 | P_THB | 14.4 |
| 65 | W | HB | 10.3 | P_THB | 10.9 |
| 29 | W | HB | 14.1 | P_THB | 14.7 |
| 66 | M | HB | 15.1 | P_THB | 15.7 |
| 77 | W | HB | 13.3 | P_THB | 13.9 |
| 48 | M | HB | 13.6 | P_THB | 14.2 |
| 46 | W | HB | 14.3 | P_THB | 14.9 |
| 53 | M | HB | 14.1 | P_THB | 14.7 |
| 53 | W | HB | 12.6 | P_THB | 13.2 |
| 82 | M | HB | 9.1  | P_THB | 9.7  |
| 53 | M | HB | 11.6 | P_THB | 12.2 |
| 49 | M | HB | 15.7 | P_THB | 16.3 |
| 60 | M | HB | 10.8 | P_THB | 11.4 |
| 24 | W | HB | 12.8 | P_THB | 13.4 |
| 40 | M | HB | 14.8 | P_THB | 15.4 |
| 86 | M | HB | 11.6 | P_THB | 12.2 |
| 27 | M | HB | 9.3  | P_THB | 9.9  |
| 44 | W | HB | 13.6 | P_THB | 14.2 |
| 31 | M | HB | 15.7 | P_THB | 16.3 |
| 74 | M | HB | 13.3 | P_THB | 13.9 |
| 84 | M | HB | 13.6 | P_THB | 14.2 |
| 56 | M | HB | 15.3 | P_THB | 15.9 |
| 76 | W | HB | 11.3 | P_THB | 11.9 |
| 57 | M | HB | 10.1 | P_THB | 10.7 |
| 89 | M | HB | 10.6 | P_THB | 11.2 |
| 39 | W | HB | 14.3 | P_THB | 14.9 |
| 73 | M | HB | 14.1 | P_THB | 14.7 |
| 57 | W | HB | 13.1 | P_THB | 13.7 |
| 25 | M | HB | 12.3 | P_THB | 12.9 |
| 79 | W | HB | 13.3 | P_THB | 13.9 |
| 60 | W | HB | 12.6 | P_THB | 13.2 |
| 65 | M | HB | 10.8 | P_THB | 11.4 |
| 42 | W | HB | 12.3 | P_THB | 12.9 |
| 25 | W | HB | 14.8 | P_THB | 15.4 |
| 47 | M | HB | 10.1 | P_THB | 10.7 |
| 74 | M | HB | 9.8  | P_THB | 10.4 |
| 71 | M | HB | 10.3 | P_THB | 10.9 |
| 59 | W | HB | 15.1 | P_THB | 15.7 |
| 40 | M | HB | 8.2  | P_THB | 7.6  |
| 31 | M | HB | 13.9 | P_THB | 14.5 |
| 68 | M | HB | 10.7 | P_THB | 11.3 |
| 62 | M | HB | 16.9 | P_THB | 17.5 |
| 61 | W | HB | 13.5 | P_THB | 14.1 |
| 58 | M | HB | 15.5 | P_THB | 16.1 |
| 68 | W | HB | 14.0 | P_THB | 14.6 |
| 17 | W | HB | 8.9  | P_THB | 9.5  |
| 75 | M | HB | 10.4 | P_THB | 11.0 |
| 45 | M | HB | 13.7 | P_THB | 14.3 |
| 24 | M | HB | 16.0 | P_THB | 16.6 |

|    |   |    |      |       |      |
|----|---|----|------|-------|------|
| 56 | M | HB | 16.4 | P_THB | 17.0 |
| 36 | W | HB | 11.9 | P_THB | 12.5 |
| 54 | W | HB | 13.4 | P_THB | 14.0 |
| 85 | M | HB | 10.2 | P_THB | 10.8 |
| 77 | W | HB | 13.0 | P_THB | 13.6 |
| 68 | M | HB | 12.5 | P_THB | 13.1 |
| 41 | W | HB | 15.0 | P_THB | 15.6 |
| 82 | W | HB | 12.7 | P_THB | 13.3 |
| 64 | W | HB | 12.5 | P_THB | 13.1 |
| 81 | M | HB | 11.7 | P_THB | 12.3 |
| 42 | M | HB | 14.4 | P_THB | 15.0 |
| 25 | W | HB | 13.7 | P_THB | 14.3 |
| 69 | M | HB | 10.7 | P_THB | 11.3 |
| 89 | W | HB | 11.5 | P_THB | 12.1 |
| 83 | W | HB | 10.9 | P_THB | 11.5 |
| 92 | M | HB | 9.2  | P_THB | 9.8  |
| 76 | W | HB | 9.4  | P_THB | 10.0 |
| 46 | M | HB | 16.0 | P_THB | 16.6 |
| 26 | M | HB | 14.2 | P_THB | 14.8 |
| 52 | M | HB | 13.9 | P_THB | 14.5 |
| 81 | M | HB | 12.4 | P_THB | 13.0 |
| 43 | W | HB | 14.2 | P_THB | 14.8 |
| 32 | W | HB | 12.2 | P_THB | 12.8 |
| 24 | W | HB | 12.7 | P_THB | 13.3 |
| 55 | W | HB | 11.9 | P_THB | 12.5 |
| 77 | W | HB | 12.7 | P_THB | 13.3 |
| 56 | M | HB | 13.9 | P_THB | 14.5 |
| 72 | W | HB | 11.2 | P_THB | 11.8 |
| 91 | M | HB | 15.4 | P_THB | 16.0 |
| 32 | M | HB | 16.0 | P_THB | 16.6 |
| 34 | M | HB | 14.6 | P_THB | 14.0 |
| 32 | W | HB | 12.4 | P_THB | 13.0 |
| 21 | M | HB | 16.6 | P_THB | 17.2 |
| 64 | M | HB | 13.7 | P_THB | 14.3 |
| 26 | W | HB | 13.9 | P_THB | 14.5 |
| 45 | M | HB | 14.9 | P_THB | 15.5 |
| 71 | M | HB | 9.9  | P_THB | 10.5 |
| 53 | M | HB | 17.3 | P_THB | 17.9 |
| 69 | M | HB | 12.9 | P_THB | 13.5 |
| 79 | M | HB | 8.7  | P_THB | 9.3  |
| 35 | M | HB | 14.7 | P_THB | 15.3 |
| 80 | M | HB | 15.2 | P_THB | 15.8 |
| 60 | M | HB | 13.7 | P_THB | 14.3 |
| 41 | W | HB | 15.6 | P_THB | 16.2 |
| 22 | W | HB | 13.5 | P_THB | 14.1 |
| 36 | W | HB | 13.5 | P_THB | 14.1 |
| 55 | M | HB | 14.7 | P_THB | 15.3 |
| 54 | M | HB | 14.7 | P_THB | 15.3 |
| 92 | W | HB | 15.0 | P_THB | 15.6 |
| 87 | M | HB | 12.9 | P_THB | 13.5 |
| 88 | M | HB | 12.5 | P_THB | 13.1 |
| 39 | M | HB | 14.4 | P_THB | 15.0 |
| 38 | M | HB | 15.4 | P_THB | 16.0 |
| 45 | M | HB | 14.5 | P_THB | 15.1 |
| 45 | W | HB | 8.2  | P_THB | 8.8  |
| 29 | W | HB | 11.9 | P_THB | 12.5 |

|     |   |    |      |       |      |
|-----|---|----|------|-------|------|
| 63  | M | HB | 14.5 | P_THB | 15.1 |
| 85  | W | HB | 14.9 | P_THB | 15.5 |
| 21  | W | HB | 13.4 | P_THB | 14.0 |
| 45  | M | HB | 14.7 | P_THB | 15.3 |
| 69  | M | HB | 12.9 | P_THB | 13.5 |
| 77  | M | HB | 14.0 | P_THB | 14.6 |
| 33  | M | HB | 15.2 | P_THB | 15.8 |
| 43  | M | HB | 15.2 | P_THB | 15.8 |
| 93  | M | HB | 13.0 | P_THB | 13.6 |
| 79  | W | HB | 14.9 | P_THB | 15.5 |
| 83  | W | HB | 10.5 | P_THB | 11.1 |
| 55  | M | HB | 15.2 | P_THB | 15.8 |
| 41  | M | HB | 16.1 | P_THB | 16.7 |
| 25  | M | HB | 14.4 | P_THB | 15.0 |
| 21  | M | HB | 13.4 | P_THB | 14.0 |
| 47  | W | HB | 10.4 | P_THB | 11.0 |
| 52  | M | HB | 15.8 | P_THB | 15.2 |
| 44  | W | HB | 14.7 | P_THB | 15.3 |
| 53  | W | HB | 14.2 | P_THB | 14.8 |
| 46  | W | HB | 15.0 | P_THB | 15.6 |
| 84  | W | HB | 11.0 | P_THB | 11.6 |
| 77  | W | HB | 9.4  | P_THB | 10.0 |
| 49  | W | HB | 13.5 | P_THB | 14.1 |
| 28  | W | HB | 13.0 | P_THB | 13.6 |
| 66  | W | HB | 9.2  | P_THB | 9.8  |
| 44  | M | HB | 14.5 | P_THB | 15.1 |
| 67  | W | HB | 11.9 | P_THB | 12.5 |
| 83  | W | HB | 11.7 | P_THB | 12.3 |
| 15  | M | HB | 14.5 | P_THB | 15.1 |
| 59  | M | HB | 13.5 | P_THB | 14.1 |
| 58  | M | HB | 11.5 | P_THB | 12.1 |
| 80  | M | HB | 14.4 | P_THB | 15.0 |
| 76  | M | HB | 16.6 | P_THB | 17.2 |
| 43  | M | HB | 11.4 | P_THB | 12.0 |
| 50  | W | HB | 14.2 | P_THB | 14.8 |
| 91  | M | HB | 9.7  | P_THB | 10.3 |
| 74  | M | HB | 14.2 | P_THB | 14.8 |
| 86  | M | HB | 14.5 | P_THB | 15.1 |
| 74  | M | HB | 12.2 | P_THB | 12.8 |
| 53  | M | HB | 12.5 | P_THB | 13.1 |
| 75  | W | HB | 13.4 | P_THB | 14.0 |
| 115 | M | HB | 12.4 | P_THB | 13.0 |
| 36  | W | HB | 12.0 | P_THB | 12.6 |
| 69  | W | HB | 9.9  | P_THB | 10.5 |
| 73  | W | HB | 14.4 | P_THB | 15.0 |
| 62  | M | HB | 9.0  | P_THB | 9.6  |
| 74  | M | HB | 8.9  | P_THB | 9.5  |
| 23  | M | HB | 14.2 | P_THB | 14.8 |
| 52  | W | HB | 13.0 | P_THB | 13.6 |
| 87  | M | HB | 13.5 | P_THB | 14.1 |
| 80  | W | HB | 13.0 | P_THB | 13.6 |
| 52  | W | HB | 13.9 | P_THB | 14.5 |
| 59  | W | HB | 16.8 | P_THB | 17.4 |
| 57  | M | HB | 15.6 | P_THB | 15.0 |
| 46  | W | HB | 16.3 | P_THB | 16.9 |
| 53  | M | HB | 13.9 | P_THB | 14.5 |

|    |   |    |      |       |      |
|----|---|----|------|-------|------|
| 24 | W | HB | 13.4 | P_THB | 14.0 |
| 79 | M | HB | 11.7 | P_THB | 12.3 |
| 29 | W | HB | 14.5 | P_THB | 15.1 |
| 82 | W | HB | 12.4 | P_THB | 13.0 |
| 46 | M | HB | 15.9 | P_THB | 16.5 |
| 27 | M | HB | 14.2 | P_THB | 14.8 |
| 28 | W | HB | 12.7 | P_THB | 13.3 |
| 40 | W | HB | 9.5  | P_THB | 10.1 |
| 51 | W | HB | 13.4 | P_THB | 14.0 |
| 84 | M | HB | 11.4 | P_THB | 12.0 |
| 89 | W | HB | 12.4 | P_THB | 13.0 |
| 33 | W | HB | 15.9 | P_THB | 16.5 |
| 92 | M | HB | 12.4 | P_THB | 13.0 |
| 86 | W | HB | 15.9 | P_THB | 16.5 |
| 54 | W | HB | 13.7 | P_THB | 14.3 |
| 50 | M | HB | 14.9 | P_THB | 15.5 |
| 64 | M | HB | 9.0  | P_THB | 9.6  |
| 35 | W | HB | 13.2 | P_THB | 13.8 |
| 83 | M | HB | 12.2 | P_THB | 12.8 |
| 37 | W | HB | 12.0 | P_THB | 12.6 |
| 17 | W | HB | 13.7 | P_THB | 14.3 |
| 85 | W | HB | 13.4 | P_THB | 14.0 |
| 79 | W | HB | 12.2 | P_THB | 12.8 |
| 38 | W | HB | 13.7 | P_THB | 14.3 |
| 11 | W | HB | 13.0 | P_THB | 13.6 |
| 78 | M | HB | 16.6 | P_THB | 17.2 |
| 37 | M | HB | 13.4 | P_THB | 14.0 |
| 89 | W | HB | 13.0 | P_THB | 13.6 |
| 33 | W | HB | 14.2 | P_THB | 14.8 |
| 57 | W | HB | 14.8 | P_THB | 14.2 |
| 65 | M | HB | 10.7 | P_THB | 11.3 |
| 73 | M | HB | 13.5 | P_THB | 14.1 |
| 78 | W | HB | 13.0 | P_THB | 13.6 |
| 66 | W | HB | 14.7 | P_THB | 15.3 |
| 51 | M | HB | 15.5 | P_THB | 16.1 |
| 55 | M | HB | 14.9 | P_THB | 15.5 |
| 54 | M | HB | 14.4 | P_THB | 15.0 |
| 72 | M | HB | 12.4 | P_THB | 13.0 |
| 31 | W | HB | 13.4 | P_THB | 14.0 |
| 17 | W | HB | 13.5 | P_THB | 14.1 |
| 32 | M | HB | 16.8 | P_THB | 17.4 |
| 37 | M | HB | 15.3 | P_THB | 14.7 |
| 20 | M | HB | 15.6 | P_THB | 15.0 |
| 75 | W | HB | 10.9 | P_THB | 11.5 |
| 27 | M | HB | 15.4 | P_THB | 16.0 |
| 28 | M | HB | 14.0 | P_THB | 13.4 |
| 71 | W | HB | 13.9 | P_THB | 14.5 |
| 42 | W | HB | 13.5 | P_THB | 14.1 |
| 90 | W | HB | 11.7 | P_THB | 12.3 |
| 37 | M | HB | 15.9 | P_THB | 16.5 |
| 45 | M | HB | 10.7 | P_THB | 11.3 |
| 72 | W | HB | 12.2 | P_THB | 12.8 |
| 81 | M | HB | 11.4 | P_THB | 12.0 |
| 24 | W | HB | 13.5 | P_THB | 14.1 |
| 63 | M | HB | 15.2 | P_THB | 15.8 |
| 47 | W | HB | 14.0 | P_THB | 14.6 |

|    |   |    |      |       |      |
|----|---|----|------|-------|------|
| 34 | M | HB | 14.9 | P_THB | 15.5 |
| 16 | M | HB | 13.9 | P_THB | 14.5 |
| 46 | W | HB | 14.0 | P_THB | 14.6 |
| 48 | W | HB | 15.9 | P_THB | 16.5 |
| 31 | W | HB | 12.7 | P_THB | 13.3 |
| 72 | M | HB | 10.4 | P_THB | 11.0 |
| 33 | M | HB | 14.7 | P_THB | 15.3 |
| 52 | M | HB | 14.4 | P_THB | 15.0 |
| 35 | W | HB | 12.4 | P_THB | 13.0 |
| 25 | W | HB | 12.0 | P_THB | 12.6 |
| 58 | W | HB | 14.5 | P_THB | 15.1 |
| 71 | W | HB | 12.0 | P_THB | 12.6 |
| 65 | M | HB | 14.4 | P_THB | 15.0 |
| 79 | M | HB | 14.9 | P_THB | 15.5 |
| 52 | W | HB | 13.2 | P_THB | 13.8 |
| 49 | M | HB | 15.2 | P_THB | 15.8 |
| 52 | W | HB | 12.9 | P_THB | 13.5 |
| 91 | W | HB | 12.7 | P_THB | 13.3 |
| 68 | M | HB | 14.7 | P_THB | 15.3 |
| 52 | M | HB | 15.0 | P_THB | 15.6 |
| 24 | M | HB | 16.6 | P_THB | 17.2 |
| 43 | M | HB | 15.0 | P_THB | 15.6 |
| 37 | M | HB | 14.4 | P_THB | 15.0 |
| 23 | W | HB | 11.0 | P_THB | 11.6 |
| 42 | M | HB | 8.0  | P_THB | 8.6  |
| 84 | W | HB | 13.7 | P_THB | 14.3 |
| 34 | M | HB | 14.0 | P_THB | 13.4 |
| 27 | M | HB | 15.0 | P_THB | 15.6 |
| 35 | W | HB | 12.7 | P_THB | 13.3 |
| 56 | M | HB | 12.9 | P_THB | 13.5 |
| 82 | M | HB | 10.9 | P_THB | 11.5 |
| 71 | W | HB | 9.5  | P_THB | 10.1 |
| 35 | W | HB | 11.2 | P_THB | 11.8 |
| 72 | W | HB | 12.4 | P_THB | 13.0 |
| 36 | M | HB | 15.2 | P_THB | 15.8 |
| 73 | M | HB | 10.5 | P_THB | 11.1 |
| 37 | W | HB | 13.9 | P_THB | 14.5 |
| 65 | M | HB | 16.0 | P_THB | 16.6 |
| 72 | W | HB | 13.9 | P_THB | 14.5 |
| 54 | M | HB | 14.4 | P_THB | 15.0 |
| 59 | M | HB | 16.0 | P_THB | 16.6 |
| 81 | M | HB | 10.2 | P_THB | 10.8 |
| 77 | W | HB | 7.7  | P_THB | 8.3  |
| 22 | W | HB | 15.0 | P_THB | 15.6 |
| 64 | W | HB | 12.0 | P_THB | 12.6 |
| 48 | M | HB | 15.6 | P_THB | 16.2 |
| 65 | M | HB | 15.2 | P_THB | 15.8 |
| 77 | W | HB | 7.2  | P_THB | 7.8  |
| 61 | W | HB | 14.5 | P_THB | 15.1 |
| 41 | M | HB | 16.1 | P_THB | 16.7 |
| 86 | M | HB | 13.7 | P_THB | 14.3 |
| 45 | M | HB | 17.8 | P_THB | 18.4 |
| 85 | W | HB | 13.2 | P_THB | 13.8 |
| 61 | M | HB | 16.0 | P_THB | 16.6 |
| 63 | M | HB | 15.0 | P_THB | 14.4 |
| 62 | M | HB | 12.5 | P_THB | 13.1 |

|    |   |    |      |       |      |
|----|---|----|------|-------|------|
| 76 | W | HB | 13.4 | P_THB | 14.0 |
| 61 | M | HB | 14.7 | P_THB | 15.3 |
| 33 | M | HB | 15.0 | P_THB | 15.6 |
| 46 | M | HB | 15.9 | P_THB | 16.5 |
| 67 | M | HB | 13.2 | P_THB | 13.8 |
| 46 | W | HB | 12.0 | P_THB | 12.6 |
| 89 | W | HB | 12.0 | P_THB | 12.6 |
| 66 | W | HB | 10.7 | P_THB | 11.3 |
| 79 | W | HB | 14.5 | P_THB | 15.1 |
| 45 | M | HB | 12.9 | P_THB | 13.5 |
| 55 | W | HB | 11.5 | P_THB | 12.1 |
| 84 | M | HB | 11.4 | P_THB | 12.0 |
| 51 | W | HB | 13.7 | P_THB | 14.3 |
| 73 | M | HB | 14.9 | P_THB | 15.5 |
| 47 | W | HB | 12.9 | P_THB | 13.5 |
| 27 | W | HB | 13.5 | P_THB | 14.1 |
| 47 | M | HB | 15.6 | P_THB | 16.2 |
| 54 | W | HB | 13.5 | P_THB | 14.1 |
| 80 | M | HB | 13.4 | P_THB | 14.0 |
| 72 | W | HB | 15.9 | P_THB | 16.5 |
| 22 | W | HB | 12.7 | P_THB | 13.3 |
| 45 | W | HB | 13.7 | P_THB | 14.3 |
| 78 | M | HB | 11.0 | P_THB | 11.6 |
| 77 | M | HB | 8.9  | P_THB | 9.5  |
| 82 | W | HB | 9.9  | P_THB | 10.5 |
| 73 | M | HB | 16.6 | P_THB | 17.3 |
| 66 | W | HB | 16.6 | P_THB | 17.3 |
| 54 | M | HB | 15.6 | P_THB | 16.3 |
| 48 | M | HB | 16.1 | P_THB | 16.8 |
| 69 | M | HB | 15.6 | P_THB | 16.3 |
| 17 | M | HB | 16.2 | P_THB | 16.9 |
| 33 | M | HB | 17.1 | P_THB | 17.8 |
| 47 | M | HB | 15.6 | P_THB | 16.3 |
| 46 | M | HB | 15.6 | P_THB | 16.3 |
| 56 | M | HB | 15.6 | P_THB | 16.3 |
| 23 | M | HB | 15.6 | P_THB | 16.3 |
| 20 | M | HB | 15.2 | P_THB | 15.9 |
| 32 | M | HB | 15.3 | P_THB | 16.0 |
| 77 | W | HB | 14.3 | P_THB | 15.0 |
| 79 | M | HB | 14.2 | P_THB | 14.9 |
| 71 | W | HB | 10.5 | P_THB | 11.2 |
| 75 | W | HB | 12.6 | P_THB | 13.3 |
| 52 | W | HB | 13.5 | P_THB | 14.2 |
| 21 | W | HB | 13.1 | P_THB | 13.8 |
| 46 | M | HB | 10.5 | P_THB | 11.2 |
| 24 | M | HB | 13.3 | P_THB | 14.0 |
| 58 | W | HB | 8.8  | P_THB | 9.5  |
| 48 | M | HB | 13.2 | P_THB | 13.9 |
| 59 | M | HB | 15.0 | P_THB | 15.7 |
| 21 | W | HB | 12.3 | P_THB | 13.0 |
| 30 | W | HB | 14.0 | P_THB | 14.7 |
| 23 | M | HB | 15.1 | P_THB | 15.8 |
| 17 | W | HB | 13.2 | P_THB | 13.9 |
| 69 | W | HB | 14.3 | P_THB | 13.6 |
| 75 | W | HB | 13.0 | P_THB | 13.7 |
| 92 | M | HB | 8.6  | P_THB | 9.3  |

|    |   |    |      |       |      |
|----|---|----|------|-------|------|
| 25 | M | HB | 14.5 | P_THB | 15.2 |
| 55 | M | HB | 14.2 | P_THB | 14.9 |
| 22 | W | HB | 12.5 | P_THB | 13.2 |
| 20 | W | HB | 13.3 | P_THB | 14.0 |
| 32 | M | HB | 15.8 | P_THB | 16.5 |
| 92 | W | HB | 11.7 | P_THB | 12.4 |
| 54 | W | HB | 12.2 | P_THB | 12.9 |
| 82 | M | HB | 13.0 | P_THB | 12.3 |
| 44 | W | HB | 13.6 | P_THB | 14.3 |
| 59 | W | HB | 14.3 | P_THB | 15.0 |
| 54 | M | HB | 14.5 | P_THB | 15.2 |
| 87 | M | HB | 11.5 | P_THB | 12.2 |
| 66 | W | HB | 9.6  | P_THB | 10.3 |
| 82 | W | HB | 13.6 | P_THB | 14.3 |
| 85 | W | HB | 8.2  | P_THB | 8.9  |
| 81 | W | HB | 13.0 | P_THB | 13.7 |
| 82 | W | HB | 9.7  | P_THB | 10.4 |
| 38 | W | HB | 13.0 | P_THB | 13.7 |
| 63 | M | HB | 13.6 | P_THB | 14.3 |
| 66 | W | HB | 8.5  | P_THB | 9.2  |
| 39 | M | HB | 14.0 | P_THB | 14.7 |
| 44 | M | HB | 10.5 | P_THB | 11.2 |
| 76 | W | HB | 11.7 | P_THB | 12.4 |
| 84 | W | HB | 12.3 | P_THB | 13.0 |
| 79 | M | HB | 11.7 | P_THB | 12.4 |
| 75 | W | HB | 13.8 | P_THB | 14.5 |
| 58 | M | HB | 14.2 | P_THB | 14.9 |
| 78 | W | HB | 12.6 | P_THB | 13.3 |
| 83 | W | HB | 11.5 | P_THB | 12.2 |
| 51 | M | HB | 13.8 | P_THB | 14.5 |
| 26 | W | HB | 13.2 | P_THB | 13.9 |
| 36 | M | HB | 13.8 | P_THB | 14.5 |
| 76 | M | HB | 12.1 | P_THB | 12.8 |
| 50 | M | HB | 14.5 | P_THB | 15.2 |
| 54 | M | HB | 14.8 | P_THB | 15.5 |
| 17 | W | HB | 12.2 | P_THB | 12.9 |
| 66 | M | HB | 11.7 | P_THB | 12.4 |
| 89 | W | HB | 13.2 | P_THB | 13.9 |
| 34 | W | HB | 13.6 | P_THB | 14.3 |
| 69 | W | HB | 8.0  | P_THB | 8.7  |
| 75 | W | HB | 11.8 | P_THB | 12.5 |
| 24 | M | HB | 15.8 | P_THB | 16.5 |
| 43 | M | HB | 13.5 | P_THB | 14.2 |
| 71 | M | HB | 8.8  | P_THB | 9.5  |
| 59 | W | HB | 11.7 | P_THB | 12.4 |
| 52 | W | HB | 13.1 | P_THB | 13.8 |
| 77 | M | HB | 9.5  | P_THB | 8.8  |
| 79 | W | HB | 12.1 | P_THB | 12.8 |
| 83 | W | HB | 11.1 | P_THB | 11.8 |
| 36 | M | HB | 13.8 | P_THB | 14.5 |
| 61 | W | HB | 13.6 | P_THB | 14.3 |
| 84 | W | HB | 12.0 | P_THB | 12.7 |
| 65 | M | HB | 8.0  | P_THB | 8.7  |
| 82 | W | HB | 11.2 | P_THB | 11.9 |
| 53 | W | HB | 12.1 | P_THB | 12.8 |
| 38 | W | HB | 12.2 | P_THB | 12.9 |

|     |   |    |      |       |      |
|-----|---|----|------|-------|------|
| 36  | W | HB | 10.7 | P_THB | 11.4 |
| 67  | W | HB | 14.2 | P_THB | 14.9 |
| 67  | W | HB | 10.5 | P_THB | 11.2 |
| 39  | W | HB | 12.5 | P_THB | 13.2 |
| 91  | M | HB | 9.3  | P_THB | 10.0 |
| 69  | W | HB | 10.8 | P_THB | 11.5 |
| 83  | M | HB | 12.2 | P_THB | 12.9 |
| 68  | M | HB | 15.1 | P_THB | 15.8 |
| 62  | W | HB | 14.0 | P_THB | 14.7 |
| 32  | M | HB | 15.0 | P_THB | 15.7 |
| 64  | W | HB | 12.6 | P_THB | 13.3 |
| 48  | M | HB | 11.0 | P_THB | 11.7 |
| 60  | W | HB | 14.0 | P_THB | 14.7 |
| 23  | M | HB | 14.7 | P_THB | 15.4 |
| 78  | W | HB | 13.6 | P_THB | 14.3 |
| 56  | W | HB | 14.0 | P_THB | 14.7 |
| 36  | W | HB | 13.1 | P_THB | 13.8 |
| 54  | W | HB | 14.7 | P_THB | 15.4 |
| 77  | W | HB | 11.7 | P_THB | 12.4 |
| 66  | M | HB | 11.6 | P_THB | 12.3 |
| 57  | W | HB | 12.1 | P_THB | 12.8 |
| 21  | W | HB | 13.1 | P_THB | 13.8 |
| 80  | M | HB | 10.4 | P_THB | 9.7  |
| 74  | M | HB | 15.1 | P_THB | 15.8 |
| 31  | W | HB | 12.1 | P_THB | 12.8 |
| 19  | W | HB | 13.6 | P_THB | 14.3 |
| 75  | M | HB | 10.5 | P_THB | 11.2 |
| 62  | W | HB | 8.0  | P_THB | 8.7  |
| 63  | W | HB | 13.1 | P_THB | 13.8 |
| 14  | W | HB | 10.7 | P_THB | 11.4 |
| 71  | M | HB | 11.2 | P_THB | 11.9 |
| 24  | W | HB | 13.7 | P_THB | 14.4 |
| 66  | M | HB | 10.8 | P_THB | 10.1 |
| 64  | M | HB | 10.7 | P_THB | 11.4 |
| 51  | W | HB | 13.5 | P_THB | 14.2 |
| 59  | M | HB | 14.4 | P_THB | 13.7 |
| 79  | M | HB | 15.0 | P_THB | 15.7 |
| 38  | W | HB | 10.2 | P_THB | 10.9 |
| 35  | W | HB | 11.8 | P_THB | 12.5 |
| 76  | M | HB | 15.3 | P_THB | 16.0 |
| 81  | M | HB | 11.8 | P_THB | 12.5 |
| 49  | M | HB | 14.5 | P_THB | 15.2 |
| 78  | W | HB | 11.5 | P_THB | 12.2 |
| 75  | M | HB | 11.3 | P_THB | 12.0 |
| 76  | M | HB | 15.0 | P_THB | 15.7 |
| 77  | W | HB | 9.8  | P_THB | 10.5 |
| 87  | M | HB | 12.3 | P_THB | 13.0 |
| 32  | M | HB | 13.3 | P_THB | 14.0 |
| 59  | W | HB | 13.3 | P_THB | 14.0 |
| 71  | W | HB | 10.3 | P_THB | 11.0 |
| 75  | M | HB | 11.5 | P_THB | 12.2 |
| 41  | M | HB | 14.8 | P_THB | 15.5 |
| 53  | M | HB | 15.7 | P_THB | 16.4 |
| 114 | M | HB | 14.8 | P_THB | 15.5 |
| 52  | M | HB | 15.8 | P_THB | 16.5 |
| 29  | W | HB | 13.5 | P_THB | 14.2 |



|    |   |    |      |       |      |
|----|---|----|------|-------|------|
| 83 | M | HB | 14.2 | P_THB | 13.5 |
| 76 | M | HB | 13.7 | P_THB | 14.4 |
| 90 | W | HB | 14.1 | P_THB | 14.8 |
| 75 | W | HB | 14.3 | P_THB | 15.0 |
| 18 | M | HB | 14.6 | P_THB | 15.3 |
| 43 | M | HB | 12.7 | P_THB | 13.4 |
| 28 | W | HB | 12.5 | P_THB | 13.2 |
| 62 | M | HB | 15.1 | P_THB | 15.8 |
| 29 | M | HB | 14.0 | P_THB | 14.7 |
| 86 | W | HB | 12.8 | P_THB | 13.5 |
| 57 | W | HB | 12.2 | P_THB | 12.9 |
| 33 | W | HB | 13.5 | P_THB | 14.2 |
| 77 | W | HB | 10.8 | P_THB | 11.5 |
| 29 | W | HB | 12.2 | P_THB | 12.9 |
| 73 | W | HB | 13.0 | P_THB | 13.7 |
| 33 | W | HB | 14.3 | P_THB | 15.0 |
| 21 | W | HB | 12.5 | P_THB | 11.8 |
| 83 | M | HB | 12.3 | P_THB | 13.0 |
| 78 | M | HB | 14.6 | P_THB | 15.3 |
| 84 | W | HB | 13.7 | P_THB | 14.4 |
| 48 | M | HB | 10.2 | P_THB | 10.9 |
| 27 | M | HB | 13.6 | P_THB | 14.3 |
| 57 | W | HB | 13.3 | P_THB | 14.0 |
| 71 | W | HB | 9.7  | P_THB | 10.4 |
| 63 | M | HB | 11.1 | P_THB | 11.8 |
| 80 | M | HB | 14.3 | P_THB | 15.0 |
| 52 | M | HB | 12.6 | P_THB | 13.3 |
| 64 | W | HB | 14.2 | P_THB | 14.9 |
| 27 | M | HB | 15.2 | P_THB | 15.9 |
| 85 | W | HB | 10.2 | P_THB | 10.9 |
| 67 | M | HB | 14.1 | P_THB | 14.8 |
| 79 | W | HB | 9.3  | P_THB | 10.0 |
| 68 | W | HB | 12.6 | P_THB | 13.3 |
| 40 | M | HB | 14.5 | P_THB | 15.2 |
| 77 | M | HB | 13.7 | P_THB | 14.4 |
| 82 | M | HB | 14.5 | P_THB | 15.2 |
| 49 | W | HB | 14.0 | P_THB | 14.7 |
| 70 | M | HB | 15.2 | P_THB | 15.9 |
| 42 | W | HB | 11.7 | P_THB | 12.4 |
| 89 | W | HB | 12.5 | P_THB | 13.2 |
| 34 | M | HB | 15.8 | P_THB | 16.5 |
| 36 | W | HB | 10.8 | P_THB | 11.5 |
| 22 | W | HB | 14.3 | P_THB | 15.0 |
| 24 | W | HB | 8.8  | P_THB | 9.5  |
| 70 | M | HB | 14.5 | P_THB | 15.2 |
| 21 | M | HB | 12.8 | P_THB | 13.5 |
| 31 | M | HB | 15.7 | P_THB | 16.4 |
| 76 | M | HB | 11.2 | P_THB | 11.9 |
| 52 | W | HB | 5.3  | P_THB | 6.0  |
| 23 | W | HB | 12.8 | P_THB | 13.5 |
| 36 | W | HB | 14.6 | P_THB | 15.3 |
| 84 | W | HB | 11.3 | P_THB | 12.0 |
| 40 | M | HB | 15.2 | P_THB | 15.9 |
| 71 | M | HB | 13.8 | P_THB | 14.5 |
| 41 | W | HB | 11.2 | P_THB | 11.9 |
| 72 | W | HB | 13.2 | P_THB | 13.9 |

|    |   |    |      |       |      |
|----|---|----|------|-------|------|
| 42 | W | HB | 10.5 | P_THB | 11.2 |
| 63 | M | HB | 12.5 | P_THB | 13.2 |
| 17 | M | HB | 14.6 | P_THB | 15.3 |
| 84 | W | HB | 15.2 | P_THB | 15.9 |
| 86 | W | HB | 12.7 | P_THB | 13.4 |
| 49 | M | HB | 13.0 | P_THB | 13.7 |
| 85 | M | HB | 10.6 | P_THB | 11.3 |
| 25 | W | HB | 13.2 | P_THB | 13.9 |
| 75 | W | HB | 12.5 | P_THB | 13.2 |
| 34 | W | HB | 12.6 | P_THB | 13.3 |
| 24 | W | HB | 13.7 | P_THB | 14.4 |
| 72 | M | HB | 13.8 | P_THB | 14.5 |
| 77 | W | HB | 10.6 | P_THB | 11.3 |
| 36 | M | HB | 11.8 | P_THB | 12.5 |
| 89 | W | HB | 12.3 | P_THB | 13.0 |
| 75 | M | HB | 12.1 | P_THB | 12.8 |
| 57 | W | HB | 14.6 | P_THB | 15.3 |
| 37 | M | HB | 13.6 | P_THB | 14.3 |
| 33 | W | HB | 14.0 | P_THB | 14.7 |
| 50 | M | HB | 15.0 | P_THB | 15.7 |
| 45 | W | HB | 12.2 | P_THB | 12.9 |
| 62 | W | HB | 9.1  | P_THB | 9.8  |
| 43 | W | HB | 10.2 | P_THB | 10.9 |
| 37 | M | HB | 14.1 | P_THB | 14.8 |
| 58 | M | HB | 13.0 | P_THB | 13.7 |
| 86 | W | HB | 11.6 | P_THB | 12.3 |
| 22 | W | HB | 10.3 | P_THB | 9.6  |
| 79 | W | HB | 8.2  | P_THB | 8.9  |
| 73 | M | HB | 13.0 | P_THB | 13.7 |
| 41 | M | HB | 13.6 | P_THB | 14.3 |
| 81 | M | HB | 12.1 | P_THB | 12.8 |
| 39 | W | HB | 12.2 | P_THB | 12.9 |
| 73 | M | HB | 15.7 | P_THB | 16.4 |
| 26 | W | HB | 13.7 | P_THB | 14.4 |
| 25 | W | HB | 10.3 | P_THB | 11.0 |
| 36 | M | HB | 9.5  | P_THB | 10.2 |
| 79 | W | HB | 10.6 | P_THB | 11.3 |
| 86 | W | HB | 11.8 | P_THB | 12.5 |
| 85 | M | HB | 11.7 | P_THB | 12.4 |
| 25 | W | HB | 12.5 | P_THB | 13.2 |
| 69 | W | HB | 13.7 | P_THB | 14.4 |
| 42 | M | HB | 7.2  | P_THB | 7.9  |
| 74 | M | HB | 7.4  | P_THB | 8.1  |
| 82 | W | HB | 5.2  | P_THB | 5.9  |
| 84 | M | HB | 5.9  | P_THB | 5.2  |
| 66 | W | HB | 14.4 | P_THB | 15.1 |
| 45 | W | HB | 13.4 | P_THB | 14.1 |
| 78 | M | HB | 15.9 | P_THB | 16.6 |
| 57 | M | HB | 17.3 | P_THB | 18.0 |
| 83 | M | HB | 12.9 | P_THB | 13.6 |
| 67 | M | HB | 13.9 | P_THB | 14.6 |
| 51 | M | HB | 15.4 | P_THB | 16.1 |
| 56 | M | HB | 12.4 | P_THB | 13.1 |
| 18 | M | HB | 17.3 | P_THB | 18.0 |
| 70 | M | HB | 11.6 | P_THB | 10.9 |
| 23 | W | HB | 13.9 | P_THB | 14.6 |

|    |   |    |      |       |      |
|----|---|----|------|-------|------|
| 71 | W | HB | 13.4 | P_THB | 14.1 |
| 57 | M | HB | 17.3 | P_THB | 18.0 |
| 88 | W | HB | 12.4 | P_THB | 13.1 |
| 26 | M | HB | 15.4 | P_THB | 16.1 |
| 50 | M | HB | 15.4 | P_THB | 16.1 |
| 26 | M | HB | 17.0 | P_THB | 17.7 |
| 94 | W | HB | 10.4 | P_THB | 11.1 |
| 19 | M | HB | 16.0 | P_THB | 16.7 |
| 70 | M | HB | 14.1 | P_THB | 13.4 |
| 50 | M | HB | 12.9 | P_THB | 13.6 |
| 69 | W | HB | 13.9 | P_THB | 14.6 |
| 68 | M | HB | 10.9 | P_THB | 11.6 |
| 25 | M | HB | 14.4 | P_THB | 15.1 |
| 43 | M | HB | 14.9 | P_THB | 15.6 |
| 63 | M | HB | 15.5 | P_THB | 16.2 |
| 58 | M | HB | 15.5 | P_THB | 16.2 |
| 53 | W | HB | 16.4 | P_THB | 17.1 |
| 73 | M | HB | 15.9 | P_THB | 16.6 |
| 15 | W | HB | 12.6 | P_THB | 11.9 |
| 58 | W | HB | 17.0 | P_THB | 16.3 |
| 67 | M | HB | 17.3 | P_THB | 18.0 |
| 74 | M | HB | 13.4 | P_THB | 14.1 |
| 38 | M | HB | 13.4 | P_THB | 14.1 |
| 67 | M | HB | 17.0 | P_THB | 17.7 |
| 52 | M | HB | 15.4 | P_THB | 16.1 |
| 38 | M | HB | 16.9 | P_THB | 17.6 |
| 80 | W | HB | 11.9 | P_THB | 12.6 |
| 53 | W | HB | 11.4 | P_THB | 12.1 |
| 66 | M | HB | 10.4 | P_THB | 11.1 |
| 33 | W | HB | 12.9 | P_THB | 13.6 |
| 32 | M | HB | 18.5 | P_THB | 19.2 |
| 78 | W | HB | 11.4 | P_THB | 12.1 |
| 48 | W | HB | 12.4 | P_THB | 13.1 |
| 20 | W | HB | 12.4 | P_THB | 13.1 |
| 53 | M | HB | 15.4 | P_THB | 16.1 |
| 71 | W | HB | 12.9 | P_THB | 13.6 |
| 34 | W | HB | 12.9 | P_THB | 13.6 |
| 70 | M | HB | 12.9 | P_THB | 13.6 |
| 33 | W | HB | 12.4 | P_THB | 13.1 |
| 27 | W | HB | 12.4 | P_THB | 13.1 |
| 48 | M | HB | 9.9  | P_THB | 10.6 |
| 18 | W | HB | 12.9 | P_THB | 13.6 |
| 48 | W | HB | 16.0 | P_THB | 16.7 |
| 49 | W | HB | 12.4 | P_THB | 13.1 |
| 48 | W | HB | 12.4 | P_THB | 13.1 |
| 34 | M | HB | 14.4 | P_THB | 15.1 |
| 73 | M | HB | 15.4 | P_THB | 16.1 |
| 78 | W | HB | 13.9 | P_THB | 14.6 |
| 25 | M | HB | 15.4 | P_THB | 16.1 |
| 67 | M | HB | 13.9 | P_THB | 14.6 |
| 47 | W | HB | 12.4 | P_THB | 13.1 |
| 74 | W | HB | 10.4 | P_THB | 11.1 |
| 24 | M | HB | 16.4 | P_THB | 17.1 |
| 44 | M | HB | 14.9 | P_THB | 15.6 |
| 25 | W | HB | 11.9 | P_THB | 12.6 |
| 72 | M | HB | 12.4 | P_THB | 13.1 |

|    |   |    |      |       |      |
|----|---|----|------|-------|------|
| 20 | W | HB | 10.9 | P_THB | 11.6 |
| 21 | M | HB | 16.9 | P_THB | 17.6 |
| 88 | W | HB | 13.4 | P_THB | 14.1 |
| 64 | M | HB | 13.9 | P_THB | 14.6 |
| 22 | M | HB | 17.3 | P_THB | 18.0 |
| 62 | M | HB | 14.9 | P_THB | 15.6 |
| 79 | M | HB | 14.4 | P_THB | 15.1 |
| 29 | M | HB | 13.9 | P_THB | 14.6 |
| 56 | M | HB | 16.4 | P_THB | 17.1 |
| 83 | W | HB | 12.4 | P_THB | 13.1 |
| 39 | W | HB | 12.9 | P_THB | 13.6 |
| 42 | M | HB | 15.4 | P_THB | 16.1 |
| 50 | W | HB | 16.3 | P_THB | 17.0 |
| 74 | M | HB | 17.3 | P_THB | 18.0 |
| 31 | W | HB | 16.0 | P_THB | 16.7 |
| 65 | M | HB | 13.9 | P_THB | 14.6 |
| 52 | M | HB | 13.4 | P_THB | 14.1 |
| 15 | M | HB | 14.4 | P_THB | 15.1 |
| 46 | W | HB | 13.4 | P_THB | 14.1 |
| 45 | M | HB | 13.6 | P_THB | 12.9 |
| 77 | W | HB | 14.4 | P_THB | 15.1 |
| 77 | W | HB | 9.9  | P_THB | 10.6 |
| 68 | M | HB | 14.4 | P_THB | 15.1 |
| 78 | M | HB | 13.6 | P_THB | 14.4 |
| 68 | M | HB | 13.9 | P_THB | 13.1 |
| 36 | M | HB | 15.1 | P_THB | 15.9 |
| 29 | M | HB | 17.0 | P_THB | 17.8 |
| 59 | W | HB | 14.6 | P_THB | 15.4 |
| 33 | M | HB | 14.1 | P_THB | 14.9 |
| 26 | M | HB | 14.6 | P_THB | 15.4 |
| 75 | M | HB | 13.1 | P_THB | 13.9 |
| 56 | W | HB | 13.1 | P_THB | 13.9 |
| 18 | W | HB | 13.1 | P_THB | 13.9 |
| 32 | M | HB | 15.1 | P_THB | 15.9 |
| 46 | W | HB | 14.1 | P_THB | 14.9 |
| 48 | W | HB | 13.1 | P_THB | 13.9 |
| 37 | M | HB | 16.6 | P_THB | 17.4 |
| 19 | M | HB | 15.5 | P_THB | 16.3 |
| 36 | M | HB | 16.5 | P_THB | 17.3 |
| 65 | M | HB | 15.5 | P_THB | 16.3 |
| 53 | M | HB | 14.6 | P_THB | 15.4 |
| 58 | M | HB | 14.1 | P_THB | 14.9 |
| 43 | W | HB | 11.1 | P_THB | 11.9 |
| 95 | W | HB | 11.6 | P_THB | 12.4 |
| 26 | M | HB | 14.1 | P_THB | 14.9 |
| 54 | M | HB | 15.1 | P_THB | 15.9 |
| 74 | W | HB | 12.1 | P_THB | 12.9 |
| 25 | W | HB | 10.6 | P_THB | 11.4 |
| 39 | W | HB | 12.1 | P_THB | 12.9 |
| 28 | M | HB | 11.6 | P_THB | 12.4 |
| 27 | M | HB | 17.2 | P_THB | 18.0 |
| 34 | M | HB | 12.6 | P_THB | 13.4 |
| 77 | W | HB | 13.1 | P_THB | 13.9 |
| 67 | M | HB | 16.2 | P_THB | 17.0 |
| 57 | W | HB | 13.1 | P_THB | 13.9 |
| 31 | M | HB | 15.5 | P_THB | 16.3 |

|    |   |    |      |       |      |
|----|---|----|------|-------|------|
| 19 | M | HB | 13.6 | P_THB | 14.4 |
| 30 | M | HB | 16.1 | P_THB | 16.9 |
| 36 | M | HB | 16.5 | P_THB | 17.3 |
| 63 | M | HB | 8.6  | P_THB | 9.4  |
| 82 | W | HB | 8.6  | P_THB | 9.4  |
| 52 | M | HB | 13.1 | P_THB | 13.9 |
| 65 | M | HB | 14.1 | P_THB | 14.9 |
| 71 | M | HB | 15.5 | P_THB | 16.3 |
| 50 | M | HB | 15.6 | P_THB | 16.4 |
| 33 | W | HB | 14.6 | P_THB | 15.4 |
| 78 | W | HB | 12.8 | P_THB | 13.6 |
| 25 | W | HB | 12.5 | P_THB | 13.3 |
| 53 | W | HB | 13.4 | P_THB | 14.2 |
| 36 | M | HB | 14.3 | P_THB | 15.1 |
| 53 | M | HB | 14.6 | P_THB | 13.8 |
| 23 | W | HB | 12.5 | P_THB | 13.3 |
| 80 | W | HB | 14.3 | P_THB | 15.1 |
| 70 | W | HB | 13.2 | P_THB | 14.0 |
| 23 | W | HB | 14.2 | P_THB | 15.0 |
| 24 | W | HB | 13.2 | P_THB | 14.0 |
| 69 | W | HB | 13.0 | P_THB | 13.8 |
| 83 | W | HB | 8.2  | P_THB | 9.0  |
| 84 | M | HB | 12.9 | P_THB | 13.7 |
| 78 | M | HB | 15.6 | P_THB | 14.8 |
| 67 | M | HB | 10.8 | P_THB | 11.6 |
| 86 | W | HB | 10.5 | P_THB | 11.3 |
| 25 | W | HB | 13.2 | P_THB | 14.0 |
| 36 | W | HB | 8.9  | P_THB | 9.7  |
| 47 | M | HB | 15.0 | P_THB | 15.8 |
| 80 | M | HB | 13.0 | P_THB | 13.8 |
| 77 | M | HB | 10.2 | P_THB | 11.0 |
| 79 | W | HB | 12.5 | P_THB | 13.3 |
| 21 | W | HB | 11.2 | P_THB | 12.0 |
| 88 | W | HB | 14.3 | P_THB | 15.1 |
| 80 | W | HB | 13.7 | P_THB | 14.5 |
| 45 | W | HB | 14.0 | P_THB | 13.2 |
| 24 | M | HB | 14.8 | P_THB | 15.6 |
| 22 | W | HB | 14.4 | P_THB | 15.2 |
| 34 | M | HB | 14.0 | P_THB | 14.8 |
| 23 | M | HB | 15.8 | P_THB | 16.6 |
| 20 | W | HB | 13.0 | P_THB | 13.8 |
| 51 | W | HB | 8.1  | P_THB | 7.3  |
| 31 | M | HB | 13.4 | P_THB | 14.2 |
| 80 | W | HB | 10.7 | P_THB | 11.5 |
| 39 | W | HB | 10.5 | P_THB | 11.3 |
| 22 | W | HB | 11.3 | P_THB | 12.1 |
| 33 | M | HB | 15.8 | P_THB | 16.6 |
| 32 | W | HB | 13.0 | P_THB | 13.8 |
| 72 | M | HB | 10.7 | P_THB | 11.5 |
| 75 | W | HB | 14.4 | P_THB | 15.2 |
| 79 | M | HB | 15.3 | P_THB | 16.1 |
| 62 | M | HB | 14.9 | P_THB | 15.7 |
| 57 | M | HB | 13.9 | P_THB | 14.7 |
| 29 | M | HB | 14.4 | P_THB | 15.2 |
| 35 | M | HB | 9.8  | P_THB | 10.6 |
| 87 | M | HB | 10.9 | P_THB | 11.7 |

|    |   |    |      |       |      |
|----|---|----|------|-------|------|
| 87 | W | HB | 14.7 | P_THB | 15.5 |
| 83 | W | HB | 13.0 | P_THB | 13.8 |
| 75 | W | HB | 10.8 | P_THB | 11.6 |
| 88 | W | HB | 10.3 | P_THB | 11.1 |
| 56 | W | HB | 12.4 | P_THB | 13.2 |
| 45 | M | HB | 13.3 | P_THB | 14.1 |
| 76 | M | HB | 14.8 | P_THB | 15.6 |
| 25 | W | HB | 13.0 | P_THB | 13.8 |
| 20 | M | HB | 13.5 | P_THB | 14.3 |
| 79 | W | HB | 9.0  | P_THB | 9.8  |
| 59 | W | HB | 11.3 | P_THB | 12.1 |
| 70 | M | HB | 15.3 | P_THB | 16.1 |
| 76 | W | HB | 13.5 | P_THB | 14.3 |
| 85 | M | HB | 14.8 | P_THB | 15.6 |
| 71 | W | HB | 13.0 | P_THB | 13.8 |
| 83 | W | HB | 10.9 | P_THB | 11.7 |
| 37 | M | HB | 15.0 | P_THB | 15.8 |
| 54 | W | HB | 13.7 | P_THB | 14.5 |
| 45 | M | HB | 13.8 | P_THB | 13.0 |
| 54 | M | HB | 15.3 | P_THB | 16.1 |
| 51 | M | HB | 14.8 | P_THB | 15.6 |
| 56 | W | HB | 9.3  | P_THB | 10.1 |
| 51 | M | HB | 13.9 | P_THB | 14.7 |
| 69 | M | HB | 13.7 | P_THB | 14.5 |
| 42 | M | HB | 10.0 | P_THB | 10.8 |
| 13 | M | HB | 14.3 | P_THB | 15.1 |
| 43 | M | HB | 13.2 | P_THB | 14.0 |
| 24 | M | HB | 12.7 | P_THB | 13.5 |
| 57 | M | HB | 15.7 | P_THB | 16.5 |
| 60 | M | HB | 15.7 | P_THB | 16.5 |
| 47 | M | HB | 13.7 | P_THB | 14.5 |
| 29 | W | HB | 13.3 | P_THB | 14.1 |
| 74 | M | HB | 13.0 | P_THB | 13.8 |
| 73 | M | HB | 10.4 | P_THB | 11.2 |
| 25 | W | HB | 13.0 | P_THB | 13.8 |
| 37 | W | HB | 14.3 | P_THB | 15.1 |
| 78 | M | HB | 13.3 | P_THB | 12.5 |
| 38 | M | HB | 15.7 | P_THB | 16.5 |
| 50 | M | HB | 14.4 | P_THB | 15.2 |
| 23 | W | HB | 11.8 | P_THB | 12.6 |
| 69 | M | HB | 12.2 | P_THB | 13.0 |
| 48 | M | HB | 15.3 | P_THB | 16.1 |
| 35 | W | HB | 14.3 | P_THB | 15.1 |
| 58 | W | HB | 14.8 | P_THB | 15.6 |
| 19 | W | HB | 13.8 | P_THB | 14.6 |
| 30 | M | HB | 9.9  | P_THB | 10.7 |
| 54 | W | HB | 12.3 | P_THB | 13.1 |
| 35 | W | HB | 15.2 | P_THB | 16.0 |
| 36 | W | HB | 13.5 | P_THB | 14.3 |
| 83 | W | HB | 13.7 | P_THB | 14.5 |
| 65 | M | HB | 9.4  | P_THB | 10.2 |
| 45 | M | HB | 15.3 | P_THB | 16.1 |
| 62 | M | HB | 10.3 | P_THB | 11.1 |
| 22 | M | HB | 13.8 | P_THB | 14.6 |
| 82 | M | HB | 10.7 | P_THB | 11.5 |
| 67 | W | HB | 15.7 | P_THB | 16.5 |

|    |   |    |      |       |      |
|----|---|----|------|-------|------|
| 87 | W | HB | 14.9 | P_THB | 15.7 |
| 41 | M | HB | 14.0 | P_THB | 14.8 |
| 17 | M | HB | 13.3 | P_THB | 14.1 |
| 70 | W | HB | 12.8 | P_THB | 13.6 |
| 45 | W | HB | 13.4 | P_THB | 14.2 |
| 81 | M | HB | 12.2 | P_THB | 13.0 |
| 48 | W | HB | 12.9 | P_THB | 13.7 |
| 33 | M | HB | 14.5 | P_THB | 15.3 |
| 61 | W | HB | 14.4 | P_THB | 15.2 |
| 51 | W | HB | 13.5 | P_THB | 14.3 |
| 70 | M | HB | 9.0  | P_THB | 9.8  |
| 62 | W | HB | 12.8 | P_THB | 13.6 |
| 31 | W | HB | 13.7 | P_THB | 14.5 |
| 77 | W | HB | 10.3 | P_THB | 11.1 |
| 75 | M | HB | 10.8 | P_THB | 11.6 |
| 55 | W | HB | 11.9 | P_THB | 12.7 |
| 57 | M | HB | 14.4 | P_THB | 15.2 |
| 79 | M | HB | 14.5 | P_THB | 15.3 |
| 70 | M | HB | 15.8 | P_THB | 16.6 |
| 22 | W | HB | 12.3 | P_THB | 13.1 |
| 58 | M | HB | 15.3 | P_THB | 16.1 |
| 35 | M | HB | 15.8 | P_THB | 16.6 |
| 18 | M | HB | 12.7 | P_THB | 13.5 |
| 31 | W | HB | 13.8 | P_THB | 14.6 |
| 59 | W | HB | 13.0 | P_THB | 13.8 |
| 27 | M | HB | 15.2 | P_THB | 16.0 |
| 68 | W | HB | 10.9 | P_THB | 11.7 |
| 63 | M | HB | 13.8 | P_THB | 14.6 |
| 85 | M | HB | 13.3 | P_THB | 14.1 |
| 57 | M | HB | 11.4 | P_THB | 12.2 |
| 28 | M | HB | 15.3 | P_THB | 16.1 |
| 70 | W | HB | 12.9 | P_THB | 13.7 |
| 77 | W | HB | 9.2  | P_THB | 10.0 |
| 48 | M | HB | 15.0 | P_THB | 15.8 |
| 58 | W | HB | 13.0 | P_THB | 13.8 |
| 76 | W | HB | 8.9  | P_THB | 9.7  |
| 38 | M | HB | 14.8 | P_THB | 15.6 |
| 40 | W | HB | 14.8 | P_THB | 15.6 |
| 52 | M | HB | 14.8 | P_THB | 15.6 |
| 21 | W | HB | 13.0 | P_THB | 13.8 |
| 50 | W | HB | 12.3 | P_THB | 13.1 |
| 22 | M | HB | 14.5 | P_THB | 15.3 |
| 41 | M | HB | 13.2 | P_THB | 12.4 |
| 94 | W | HB | 11.9 | P_THB | 12.7 |
| 46 | M | HB | 15.3 | P_THB | 16.1 |
| 34 | W | HB | 10.2 | P_THB | 11.0 |
| 24 | M | HB | 12.9 | P_THB | 13.7 |
| 50 | M | HB | 10.2 | P_THB | 11.0 |
| 32 | W | HB | 13.2 | P_THB | 14.0 |
| 86 | M | HB | 13.5 | P_THB | 14.3 |
| 52 | M | HB | 15.3 | P_THB | 16.1 |
| 74 | M | HB | 12.0 | P_THB | 12.8 |
| 53 | M | HB | 14.9 | P_THB | 15.7 |
| 67 | M | HB | 10.7 | P_THB | 11.5 |
| 23 | W | HB | 13.3 | P_THB | 14.1 |
| 45 | M | HB | 17.4 | P_THB | 18.2 |

|    |   |    |      |       |      |
|----|---|----|------|-------|------|
| 47 | M | HB | 15.9 | P_THB | 16.7 |
| 31 | M | HB | 15.4 | P_THB | 16.2 |
| 25 | M | HB | 16.3 | P_THB | 17.1 |
| 71 | M | HB | 17.9 | P_THB | 18.7 |
| 40 | M | HB | 16.8 | P_THB | 17.6 |
| 62 | M | HB | 16.8 | P_THB | 17.6 |
| 47 | M | HB | 16.3 | P_THB | 17.1 |
| 47 | M | HB | 16.4 | P_THB | 17.2 |
| 34 | M | HB | 17.2 | P_THB | 18.1 |
| 58 | W | HB | 12.5 | P_THB | 13.4 |
| 74 | M | HB | 13.9 | P_THB | 13.0 |
| 65 | W | HB | 11.0 | P_THB | 11.9 |
| 84 | M | HB | 12.1 | P_THB | 13.0 |
| 40 | W | HB | 13.1 | P_THB | 14.0 |
| 15 | W | HB | 13.1 | P_THB | 14.0 |
| 88 | W | HB | 11.1 | P_THB | 12.0 |
| 47 | M | HB | 16.2 | P_THB | 17.1 |
| 44 | W | HB | 9.6  | P_THB | 10.5 |
| 63 | W | HB | 12.1 | P_THB | 13.0 |
| 55 | M | HB | 13.0 | P_THB | 13.9 |
| 66 | M | HB | 14.6 | P_THB | 15.5 |
| 34 | M | HB | 17.1 | P_THB | 18.0 |
| 66 | W | HB | 9.5  | P_THB | 10.4 |
| 44 | M | HB | 13.8 | P_THB | 14.7 |
| 57 | W | HB | 14.5 | P_THB | 15.4 |
| 21 | W | HB | 12.6 | P_THB | 13.5 |
| 40 | M | HB | 15.4 | P_THB | 16.3 |
| 23 | M | HB | 16.9 | P_THB | 17.8 |
| 49 | M | HB | 14.0 | P_THB | 14.9 |
| 25 | M | HB | 16.1 | P_THB | 17.0 |
| 48 | M | HB | 14.3 | P_THB | 15.2 |
| 47 | M | HB | 15.5 | P_THB | 16.4 |
| 84 | W | HB | 14.0 | P_THB | 14.9 |
| 37 | M | HB | 16.7 | P_THB | 17.6 |
| 40 | W | HB | 13.5 | P_THB | 14.4 |
| 34 | W | HB | 11.5 | P_THB | 12.4 |
| 40 | W | HB | 12.0 | P_THB | 12.9 |
| 67 | M | HB | 13.6 | P_THB | 14.5 |
| 76 | W | HB | 12.8 | P_THB | 13.7 |
| 71 | W | HB | 9.3  | P_THB | 10.2 |
| 58 | W | HB | 14.8 | P_THB | 15.7 |
| 32 | W | HB | 13.1 | P_THB | 14.0 |
| 65 | M | HB | 18.1 | P_THB | 19.0 |
| 52 | M | HB | 10.1 | P_THB | 11.0 |
| 55 | M | HB | 12.8 | P_THB | 13.7 |
| 57 | W | HB | 12.0 | P_THB | 12.9 |
| 63 | M | HB | 15.4 | P_THB | 16.3 |
| 56 | M | HB | 15.5 | P_THB | 16.4 |
| 82 | W | HB | 12.5 | P_THB | 13.4 |
| 75 | W | HB | 12.6 | P_THB | 13.5 |
| 72 | W | HB | 13.9 | P_THB | 13.0 |
| 70 | M | HB | 9.1  | P_THB | 10.0 |
| 22 | W | HB | 14.1 | P_THB | 15.0 |
| 51 | W | HB | 15.6 | P_THB | 16.5 |
| 31 | W | HB | 13.1 | P_THB | 14.0 |
| 46 | W | HB | 12.1 | P_THB | 13.0 |



|    |   |    |      |       |      |
|----|---|----|------|-------|------|
| 31 | W | HB | 13.5 | P_THB | 14.4 |
| 32 | M | HB | 17.9 | P_THB | 18.8 |
| 58 | M | HB | 16.7 | P_THB | 17.6 |
| 34 | M | HB | 15.6 | P_THB | 16.5 |
| 50 | W | HB | 12.7 | P_THB | 11.8 |
| 18 | W | HB | 11.5 | P_THB | 12.4 |
| 51 | M | HB | 16.6 | P_THB | 17.5 |
| 39 | M | HB | 15.4 | P_THB | 16.3 |
| 41 | W | HB | 13.8 | P_THB | 14.7 |
| 27 | W | HB | 15.0 | P_THB | 15.9 |
| 16 | M | HB | 15.6 | P_THB | 16.5 |
| 87 | W | HB | 10.5 | P_THB | 11.4 |
| 60 | W | HB | 11.0 | P_THB | 11.9 |
| 27 | M | HB | 13.3 | P_THB | 14.2 |
| 76 | W | HB | 13.1 | P_THB | 14.0 |
| 51 | W | HB | 11.8 | P_THB | 12.7 |
| 50 | W | HB | 13.3 | P_THB | 14.2 |
| 56 | M | HB | 16.0 | P_THB | 16.9 |
| 74 | W | HB | 10.5 | P_THB | 9.6  |
| 28 | W | HB | 10.3 | P_THB | 11.2 |
| 42 | M | HB | 15.4 | P_THB | 16.3 |
| 17 | W | HB | 9.6  | P_THB | 10.5 |
| 17 | W | HB | 13.0 | P_THB | 13.9 |
| 75 | M | HB | 12.0 | P_THB | 12.9 |
| 53 | W | HB | 12.3 | P_THB | 13.2 |
| 52 | M | HB | 9.8  | P_THB | 10.7 |
| 31 | M | HB | 13.7 | P_THB | 14.6 |
| 54 | M | HB | 15.7 | P_THB | 16.6 |
| 75 | W | HB | 9.4  | P_THB | 10.3 |
| 74 | W | HB | 10.7 | P_THB | 11.6 |
| 59 | M | HB | 7.7  | P_THB | 8.6  |
| 52 | M | HB | 15.2 | P_THB | 16.1 |
| 26 | W | HB | 14.4 | P_THB | 15.3 |
| 65 | M | HB | 14.7 | P_THB | 15.6 |
| 23 | W | HB | 13.2 | P_THB | 14.1 |
| 19 | W | HB | 13.2 | P_THB | 14.1 |
| 80 | W | HB | 12.2 | P_THB | 13.1 |
| 59 | M | HB | 13.7 | P_THB | 14.6 |
| 23 | M | HB | 15.8 | P_THB | 16.7 |
| 71 | W | HB | 10.9 | P_THB | 11.8 |
| 77 | W | HB | 12.7 | P_THB | 13.6 |
| 43 | M | HB | 14.4 | P_THB | 15.3 |
| 77 | W | HB | 13.9 | P_THB | 14.8 |
| 26 | W | HB | 14.7 | P_THB | 15.6 |
| 44 | W | HB | 13.2 | P_THB | 14.1 |
| 80 | W | HB | 15.8 | P_THB | 16.7 |
| 81 | M | HB | 10.4 | P_THB | 11.3 |
| 40 | W | HB | 12.6 | P_THB | 11.7 |
| 77 | M | HB | 14.7 | P_THB | 15.6 |
| 90 | M | HB | 11.7 | P_THB | 12.6 |
| 32 | W | HB | 10.4 | P_THB | 11.3 |
| 95 | M | HB | 10.7 | P_THB | 11.6 |
| 90 | W | HB | 10.8 | P_THB | 9.9  |
| 49 | W | HB | 13.7 | P_THB | 14.6 |
| 56 | M | HB | 14.9 | P_THB | 15.8 |
| 78 | M | HB | 9.2  | P_THB | 10.1 |

|    |   |    |      |       |      |
|----|---|----|------|-------|------|
| 75 | M | HB | 10.7 | P_THB | 11.6 |
| 64 | W | HB | 12.4 | P_THB | 13.3 |
| 10 | M | HB | 11.7 | P_THB | 12.6 |
| 44 | W | HB | 15.3 | P_THB | 16.2 |
| 38 | M | HB | 13.9 | P_THB | 14.8 |
| 63 | M | HB | 9.9  | P_THB | 10.8 |
| 78 | W | HB | 12.2 | P_THB | 13.1 |
| 45 | M | HB | 10.4 | P_THB | 11.3 |
| 57 | M | HB | 10.9 | P_THB | 11.8 |
| 52 | M | HB | 15.2 | P_THB | 16.1 |
| 45 | W | HB | 14.2 | P_THB | 15.1 |
| 28 | W | HB | 12.7 | P_THB | 13.6 |
| 79 | M | HB | 15.2 | P_THB | 16.1 |
| 72 | M | HB | 11.9 | P_THB | 12.8 |
| 80 | W | HB | 12.2 | P_THB | 13.1 |
| 81 | M | HB | 11.4 | P_THB | 12.3 |
| 80 | W | HB | 9.9  | P_THB | 10.8 |
| 71 | M | HB | 12.2 | P_THB | 13.1 |
| 45 | W | HB | 15.8 | P_THB | 16.7 |
| 50 | M | HB | 16.3 | P_THB | 17.2 |
| 55 | M | HB | 18.8 | P_THB | 19.7 |
| 44 | M | HB | 16.8 | P_THB | 17.7 |
| 62 | M | HB | 16.3 | P_THB | 17.2 |
| 65 | M | HB | 10.5 | P_THB | 11.5 |
| 55 | W | HB | 12.0 | P_THB | 13.0 |
| 24 | W | HB | 12.7 | P_THB | 13.7 |
| 80 | M | HB | 13.9 | P_THB | 14.9 |
| 76 | M | HB | 9.1  | P_THB | 10.1 |
| 20 | M | HB | 13.8 | P_THB | 14.8 |
| 64 | M | HB | 14.6 | P_THB | 15.6 |
| 38 | M | HB | 16.8 | P_THB | 17.8 |
| 25 | W | HB | 15.5 | P_THB | 16.5 |
| 19 | M | HB | 11.2 | P_THB | 12.2 |
| 30 | M | HB | 16.4 | P_THB | 17.4 |
| 83 | M | HB | 13.9 | P_THB | 14.9 |
| 76 | W | HB | 10.5 | P_THB | 11.5 |
| 88 | W | HB | 12.8 | P_THB | 13.8 |
| 34 | W | HB | 12.6 | P_THB | 13.6 |
| 23 | W | HB | 12.6 | P_THB | 13.6 |
| 19 | M | HB | 16.3 | P_THB | 17.3 |
| 59 | M | HB | 15.5 | P_THB | 16.5 |
| 82 | W | HB | 10.4 | P_THB | 11.4 |
| 79 | M | HB | 11.8 | P_THB | 12.8 |
| 46 | M | HB | 14.9 | P_THB | 15.9 |
| 53 | W | HB | 14.1 | P_THB | 15.1 |
| 56 | W | HB | 13.7 | P_THB | 14.7 |
| 89 | W | HB | 13.6 | P_THB | 14.6 |
| 63 | M | HB | 11.5 | P_THB | 12.5 |
| 70 | M | HB | 15.4 | P_THB | 16.4 |
| 76 | M | HB | 12.1 | P_THB | 13.1 |
| 72 | W | HB | 9.5  | P_THB | 10.5 |
| 85 | M | HB | 13.1 | P_THB | 14.1 |
| 29 | W | HB | 14.1 | P_THB | 15.1 |
| 79 | W | HB | 11.4 | P_THB | 12.4 |
| 20 | W | HB | 12.2 | P_THB | 13.2 |
| 19 | W | HB | 12.5 | P_THB | 13.5 |

|    |   |    |      |       |      |
|----|---|----|------|-------|------|
| 73 | W | HB | 14.5 | P_THB | 15.5 |
| 50 | W | HB | 13.8 | P_THB | 14.8 |
| 23 | M | HB | 16.4 | P_THB | 17.4 |
| 90 | W | HB | 11.3 | P_THB | 12.3 |
| 73 | W | HB | 11.5 | P_THB | 12.5 |
| 56 | M | HB | 12.0 | P_THB | 13.0 |
| 28 | W | HB | 13.5 | P_THB | 14.5 |
| 73 | M | HB | 10.3 | P_THB | 11.3 |
| 31 | M | HB | 13.3 | P_THB | 14.3 |
| 36 | W | HB | 14.8 | P_THB | 15.8 |
| 25 | M | HB | 14.4 | P_THB | 13.4 |
| 44 | W | HB | 14.3 | P_THB | 15.3 |
| 26 | W | HB | 12.3 | P_THB | 13.3 |
| 35 | W | HB | 13.8 | P_THB | 12.8 |
| 65 | W | HB | 13.7 | P_THB | 14.7 |
| 17 | W | HB | 12.3 | P_THB | 13.3 |
| 66 | M | HB | 13.1 | P_THB | 14.1 |
| 77 | W | HB | 13.6 | P_THB | 12.6 |
| 51 | M | HB | 15.5 | P_THB | 16.5 |
| 63 | M | HB | 7.0  | P_THB | 8.0  |
| 76 | W | HB | 13.0 | P_THB | 12.0 |
| 68 | M | HB | 12.4 | P_THB | 13.4 |
| 92 | W | HB | 13.8 | P_THB | 14.8 |
| 29 | M | HB | 16.3 | P_THB | 17.3 |
| 18 | W | HB | 11.3 | P_THB | 12.3 |
| 17 | W | HB | 13.5 | P_THB | 14.5 |
| 73 | W | HB | 13.2 | P_THB | 14.2 |
| 75 | M | HB | 9.0  | P_THB | 10.0 |
| 63 | W | HB | 9.3  | P_THB | 10.3 |
| 36 | M | HB | 16.9 | P_THB | 17.9 |
| 53 | M | HB | 10.8 | P_THB | 9.8  |
| 54 | W | HB | 16.0 | P_THB | 17.0 |
| 62 | W | HB | 14.7 | P_THB | 13.7 |
| 62 | M | HB | 13.8 | P_THB | 12.8 |
| 63 | M | HB | 15.2 | P_THB | 14.2 |
| 76 | W | HB | 11.3 | P_THB | 12.3 |
| 61 | W | HB | 14.1 | P_THB | 15.1 |
| 76 | W | HB | 12.3 | P_THB | 13.3 |
| 62 | W | HB | 10.7 | P_THB | 11.7 |
| 58 | M | HB | 16.9 | P_THB | 17.9 |
| 71 | M | HB | 15.2 | P_THB | 16.2 |
| 67 | M | HB | 15.7 | P_THB | 16.7 |
| 23 | W | HB | 15.2 | P_THB | 16.2 |
| 79 | M | HB | 17.7 | P_THB | 18.8 |
| 74 | W | HB | 10.1 | P_THB | 11.2 |
| 60 | W | HB | 12.1 | P_THB | 13.2 |
| 56 | M | HB | 15.2 | P_THB | 16.3 |
| 55 | W | HB | 11.8 | P_THB | 12.9 |
| 76 | W | HB | 12.8 | P_THB | 13.9 |
| 76 | M | HB | 12.6 | P_THB | 13.7 |
| 37 | W | HB | 11.6 | P_THB | 12.7 |
| 43 | M | HB | 15.4 | P_THB | 14.3 |
| 75 | M | HB | 7.3  | P_THB | 8.4  |
| 77 | M | HB | 10.6 | P_THB | 11.7 |
| 79 | M | HB | 14.8 | P_THB | 15.9 |
| 21 | W | HB | 12.3 | P_THB | 13.4 |

|    |   |    |      |       |      |
|----|---|----|------|-------|------|
| 89 | W | HB | 15.2 | P_THB | 16.3 |
| 74 | M | HB | 13.3 | P_THB | 14.4 |
| 74 | W | HB | 7.4  | P_THB | 8.5  |
| 70 | W | HB | 7.1  | P_THB | 6.0  |
| 55 | W | HB | 14.0 | P_THB | 15.1 |
| 49 | M | HB | 14.4 | P_THB | 15.5 |
| 42 | M | HB | 14.7 | P_THB | 15.8 |
| 44 | M | HB | 17.4 | P_THB | 18.5 |
| 57 | W | HB | 14.5 | P_THB | 15.6 |
| 24 | W | HB | 12.2 | P_THB | 13.3 |
| 52 | W | HB | 13.5 | P_THB | 14.6 |
| 74 | W | HB | 12.9 | P_THB | 14.0 |
| 28 | M | HB | 15.5 | P_THB | 14.4 |
| 29 | W | HB | 12.0 | P_THB | 10.9 |
| 51 | W | HB | 15.3 | P_THB | 14.2 |
| 70 | M | HB | 10.4 | P_THB | 11.5 |
| 79 | W | HB | 10.5 | P_THB | 11.6 |
| 81 | M | HB | 13.0 | P_THB | 11.9 |
| 22 | M | HB | 15.6 | P_THB | 14.5 |
| 75 | W | HB | 12.4 | P_THB | 13.5 |
| 63 | W | HB | 11.0 | P_THB | 12.1 |
| 30 | M | HB | 17.1 | P_THB | 18.2 |
| 82 | W | HB | 16.0 | P_THB | 17.1 |
| 41 | W | HB | 13.4 | P_THB | 14.5 |
| 31 | M | HB | 16.3 | P_THB | 17.4 |
| 70 | M | HB | 12.7 | P_THB | 13.9 |
| 37 | W | HB | 13.6 | P_THB | 14.8 |
| 61 | W | HB | 5.4  | P_THB | 6.6  |
| 60 | W | HB | 15.3 | P_THB | 16.5 |
| 84 | M | HB | 11.8 | P_THB | 13.0 |
| 48 | W | HB | 10.8 | P_THB | 12.0 |
| 32 | M | HB | 14.3 | P_THB | 15.5 |
| 34 | M | HB | 15.7 | P_THB | 16.9 |
| 38 | W | HB | 10.7 | P_THB | 11.9 |
| 50 | M | HB | 15.8 | P_THB | 17.0 |
| 75 | M | HB | 14.0 | P_THB | 12.8 |
| 74 | W | HB | 13.7 | P_THB | 14.9 |
| 78 | M | HB | 14.0 | P_THB | 15.2 |
| 70 | M | HB | 11.5 | P_THB | 12.7 |
| 66 | W | HB | 7.4  | P_THB | 8.6  |
| 83 | M | HB | 6.7  | P_THB | 7.9  |
| 77 | W | HB | 6.6  | P_THB | 7.8  |
| 44 | M | HB | 14.9 | P_THB | 16.1 |
| 51 | M | HB | 18.3 | P_THB | 19.5 |
| 49 | M | HB | 14.4 | P_THB | 15.6 |
| 84 | W | HB | 11.4 | P_THB | 12.6 |
| 37 | W | HB | 14.6 | P_THB | 13.4 |
| 73 | M | HB | 8.4  | P_THB | 9.6  |
| 61 | M | HB | 16.5 | P_THB | 17.7 |
| 51 | M | HB | 11.1 | P_THB | 12.4 |
| 55 | M | HB | 15.0 | P_THB | 16.3 |
| 19 | W | HB | 10.9 | P_THB | 12.2 |
| 73 | W | HB | 13.2 | P_THB | 11.9 |
| 52 | W | HB | 11.8 | P_THB | 10.5 |
| 28 | M | HB | 14.3 | P_THB | 15.6 |
| 25 | M | HB | 14.8 | P_THB | 16.1 |

|    |   |    |      |       |      |
|----|---|----|------|-------|------|
| 89 | M | HB | 12.7 | P_THB | 14.0 |
| 49 | W | HB | 14.0 | P_THB | 15.3 |
| 49 | M | HB | 15.3 | P_THB | 16.6 |
| 86 | W | HB | 16.5 | P_THB | 15.1 |
| 90 | M | HB | 12.1 | P_THB | 13.5 |
| 26 | W | HB | 13.5 | P_THB | 14.9 |
| 64 | M | HB | 12.5 | P_THB | 11.1 |
| 86 | M | HB | 10.7 | P_THB | 9.3  |
| 53 | W | HB | 3.7  | P_THB | 2.3  |
| 16 | M | HB | 8.1  | P_THB | 6.7  |
| 50 | W | HB | 14.2 | P_THB | 15.6 |
| 75 | M | HB | 14.3 | P_THB | 12.9 |
| 61 | M | HB | 8.1  | P_THB | 6.7  |
| 59 | W | HB | 10.2 | P_THB | 11.6 |
| 80 | W | HB | 16.8 | P_THB | 18.2 |
| 31 | M | HB | 15.4 | P_THB | 16.9 |
| 63 | M | HB | 5.6  | P_THB | 7.1  |
| 65 | W | HB | 13.5 | P_THB | 12.0 |
| 82 | W | HB | 8.7  | P_THB | 7.2  |
| 56 | W | HB | 11.3 | P_THB | 12.8 |
| 16 | M | HB | 14.0 | P_THB | 15.5 |
| 71 | M | HB | 13.9 | P_THB | 12.4 |
| 46 | W | HB | 8.8  | P_THB | 10.3 |
| 70 | W | HB | 10.5 | P_THB | 12.0 |
| 71 | M | HB | 14.9 | P_THB | 13.4 |
| 73 | W | HB | 11.7 | P_THB | 10.1 |
| 63 | W | HB | 16.3 | P_THB | 14.7 |
| 85 | M | HB | 10.7 | P_THB | 12.3 |
| 74 | W | HB | 11.3 | P_THB | 9.6  |
| 90 | W | HB | 13.1 | P_THB | 11.4 |
| 65 | M | HB | 12.4 | P_THB | 14.1 |
| 38 | M | HB | 15.1 | P_THB | 13.4 |
| 27 | M | HB | 5.8  | P_THB | 7.6  |
| 90 | W | HB | 11.5 | P_THB | 13.3 |
| 71 | M | HB | 13.3 | P_THB | 11.5 |
| 54 | W | HB | 13.8 | P_THB | 15.6 |
| 85 | W | HB | 12.0 | P_THB | 13.8 |
| 79 | M | HB | 5.7  | P_THB | 7.5  |
| 50 | M | HB | 13.3 | P_THB | 15.1 |
| 77 | M | HB | 10.0 | P_THB | 11.8 |
| 58 | M | HB | 11.6 | P_THB | 13.5 |
| 62 | M | HB | 8.5  | P_THB | 10.4 |
| 85 | W | HB | 10.8 | P_THB | 12.7 |
| 57 | W | HB | 12.8 | P_THB | 14.7 |
| 79 | W | HB | 13.3 | P_THB | 15.2 |
| 46 | W | HB | 15.1 | P_THB | 13.1 |
| 23 | M | HB | 10.7 | P_THB | 8.6  |
| 59 | W | HB | 12.6 | P_THB | 10.5 |
| 67 | M | HB | 8.2  | P_THB | 10.3 |
| 56 | M | HB | 15.9 | P_THB | 13.7 |
| 25 | W | HB | 10.4 | P_THB | 8.2  |
| 94 | W | HB | 7.7  | P_THB | 5.5  |
| 77 | W | HB | 13.6 | P_THB | 11.4 |
| 47 | W | HB | 12.8 | P_THB | 10.5 |
| 50 | W | HB | 13.0 | P_THB | 15.3 |
| 68 | W | HB | 12.6 | P_THB | 10.3 |

|    |   |    |      |       |      |
|----|---|----|------|-------|------|
| 32 | M | HB | 14.4 | P_THB | 12.0 |
| 25 | M | HB | 16.8 | P_THB | 19.2 |
| 77 | W | HB | 12.8 | P_THB | 15.3 |
| 59 | M | HB | 8.8  | P_THB | 11.4 |
| 40 | M | HB | 17.8 | P_THB | 15.1 |
| 80 | W | HB | 10.5 | P_THB | 13.2 |
| 32 | W | HB | 15.1 | P_THB | 12.4 |
| 75 | W | HB | 12.7 | P_THB | 9.8  |
| 66 | M | HB | 13.7 | P_THB | 10.8 |
| 58 | W | HB | 13.0 | P_THB | 10.1 |
| 35 | M | HB | 15.9 | P_THB | 19.0 |
| 67 | W | HB | 10.1 | P_THB | 13.3 |
| 85 | W | HB | 15.5 | P_THB | 12.3 |
| 54 | W | HB | 14.1 | P_THB | 10.8 |
| 34 | M | HB | 15.6 | P_THB | 12.1 |
| 58 | W | HB | 14.5 | P_THB | 18.0 |
| 73 | M | HB | 14.9 | P_THB | 11.1 |
| 73 | M | HB | 7.2  | P_THB | 11.1 |
| 55 | W | HB | 9.7  | P_THB | 13.7 |
| 76 | M | HB | 10.3 | P_THB | 14.4 |
| 40 | M | HB | 8.9  | P_THB | 13.0 |
| 46 | M | HB | 8.2  | P_THB | 12.3 |
| 65 | W | HB | 5.7  | P_THB | 10.1 |
| 62 | W | HB | 2.6  | P_THB | 7.1  |
| 83 | W | HB | 8.2  | P_THB | 13.1 |
| 30 | W | HB | 9.7  | P_THB | 15.0 |
| 72 | W | HB | 9.8  | P_THB | 3.9  |
| 31 | W | HB | 14.2 | P_THB | 20.2 |
| 48 | M | HB | 7.9  | P_THB | 15.1 |
